# Supplementary material for: Characterizing gibberellin flow in planta using photocaged gibberellins
Source: PubMed Central journal article supplement — Chem Sci. 2018 Nov 20;10(5):1500–5. doi: 10.1039/c8sc04528c (PMC6354844; doi:10.1039/c8sc04528c), 2018-11-20
Supplement: SC-010-C8SC04528C-s003.pdf [file SC-010-C8SC04528C-s003.pdf]

### SI movie legends

**Movie 1** – 4 days old *pRGA:GFP-RGA* transgenic *Arabidopsis* seedlings were grown for 1 overnight on paclobutrazol (2  $\mu\text{M}$ ) then incubated with PI. The seedlings were mounted on slides and root tips were imaged every 1 minute for 90 minutes. *Red*: PI. *Green*: GFP-RGA. Movie is at 10 fps.

**Movie 2** – 4 days old *pRGA:GFP-RGA* transgenic *Arabidopsis* seedlings were grown for 1 overnight on paclobutrazol (2  $\mu\text{M}$ ) then incubated with 4 (5  $\mu\text{M}$ , 25 min) and PI. The seedlings were mounted on slides, irradiated with 365 nm light (2  $\text{mW}/\text{cm}^2$ , 10 seconds) at the root tip and imaged every 1 minute for 90 minutes. *Red*: PI. *Green*: GFP-RGA. Movie is at 10 fps.
