# Supplementary material for: Characterizing gibberellin flow in planta using photocaged gibberellins
Source: PubMed Central journal article supplement — Chem Sci. 2018 Nov 20;10(5):1500–5. doi: 10.1039/c8sc04528c (PMC6354844; doi:10.1039/c8sc04528c), 2018-11-20
Supplement: SC-010-C8SC04528C-s004.pdf [file SC-010-C8SC04528C-s004.pdf]

## Supplementary Information File

# Characterizing gibberellins flow *in planta* using photocaged gibberellins

Shira Wexler<sup>a</sup>, Hilla Schayek<sup>a</sup>, Kandhikonda Rajendar<sup>a</sup>, Iris Tal<sup>a</sup>, Adi Avni<sup>a</sup>, Eilon Shani<sup>a</sup>,  
Yasmine Meroz<sup>a</sup>, Roman Dobrovetsky<sup>b</sup> and Roy Weinstain<sup>\*,a</sup>

Shira Wexler<sup>a</sup>, Hilla Schayek<sup>a</sup>, Kandhikonda Rajendar<sup>a</sup>, Iris Tal<sup>a</sup>, Eilon Shani<sup>a</sup>, Yasmine  
Meroz<sup>a</sup>, Roman Dobrovetsky<sup>b</sup>, Roy Weinstain<sup>a,\*</sup>

<sup>a</sup> School of Plant Sciences and Food Security, Life Sciences Faculty, Tel Aviv University, Tel Aviv 6997801, Israel.

<sup>b</sup> School of Chemistry, Raymond and Beverly Sackler Faculty of Exact Sciences, Tel Aviv University, Tel Aviv 6997801, Israel.

### Table of Contents

|                                                                          |     |
|--------------------------------------------------------------------------|-----|
| 1. Supporting Figures.....                                               | S2  |
| 2. General synthetic and analytical methods.....                         | S5  |
| 3. Synthetic procedures.....                                             | S5  |
| 4. Methods and experimental procedures.....                              | S9  |
| 5. References.....                                                       | S13 |
| 6. <sup>1</sup> H- and <sup>13</sup> C-NMR spectra of compounds 1-4..... | S14 |
| 7. DFT calculations data.....                                            | S18 |

## Supporting figures

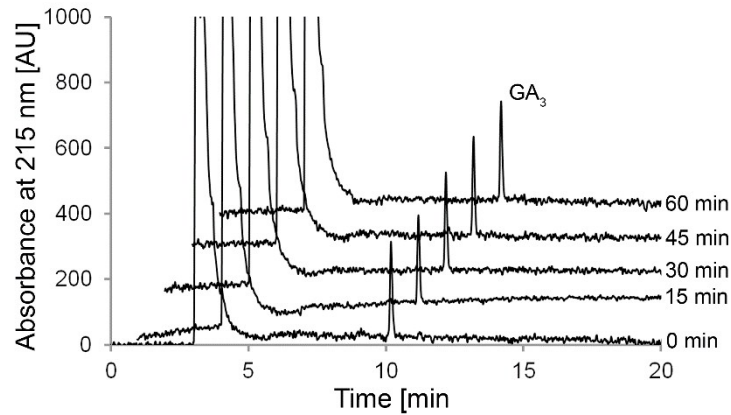

**Figure S1.** GA<sub>3</sub> stability under continuous UV light. A 2 mL solution of 500 μM GA<sub>3</sub> in ddH<sub>2</sub>O (5% DMSO) was irradiated with 365 nm light (4 X 8W bulbs) for the specified durations. At each time point, a sample was taken and analyzed by HPLC-MS (monitored at 215 nm). GA<sub>3</sub> peak appears at RT = 10.17 min.

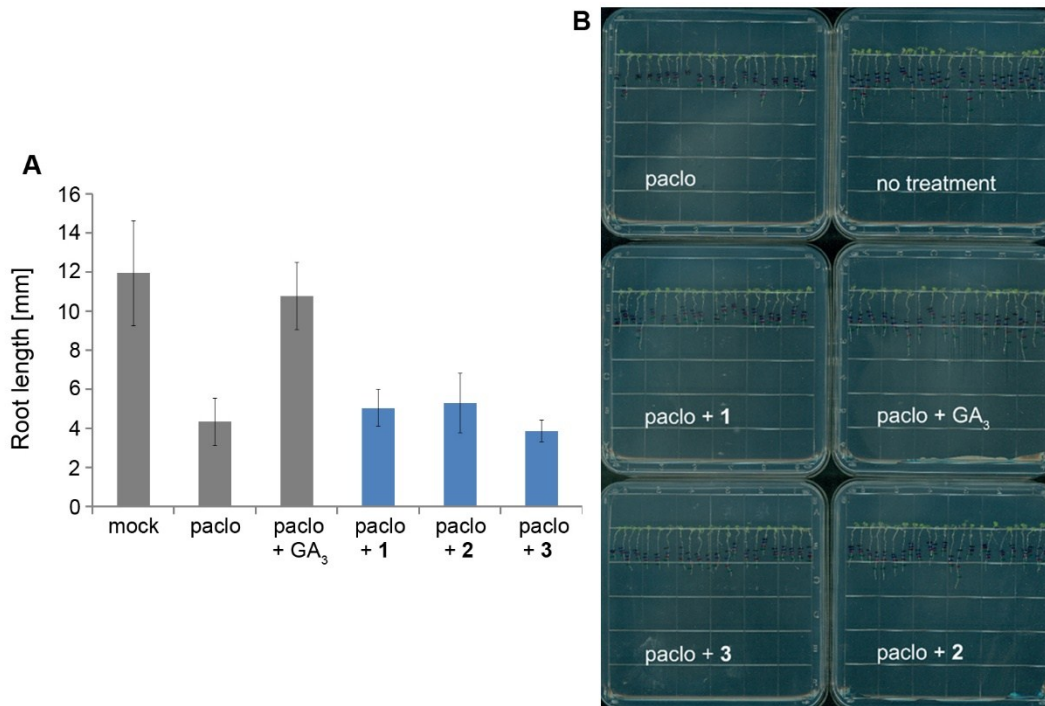

**Figure S2.** Root elongation assay. A) 4-days old WT seedlings (n = 27-32) were transferred onto MS plates containing 2 μM paclo and either GA<sub>3</sub> or 1-3 (25 mM). Roots length was measured at day 4. Experiment was repeated 3 times. Mock represents no treatment. Error bars represent STDV. B) A representative image of one root elongation assay results quantified in A.

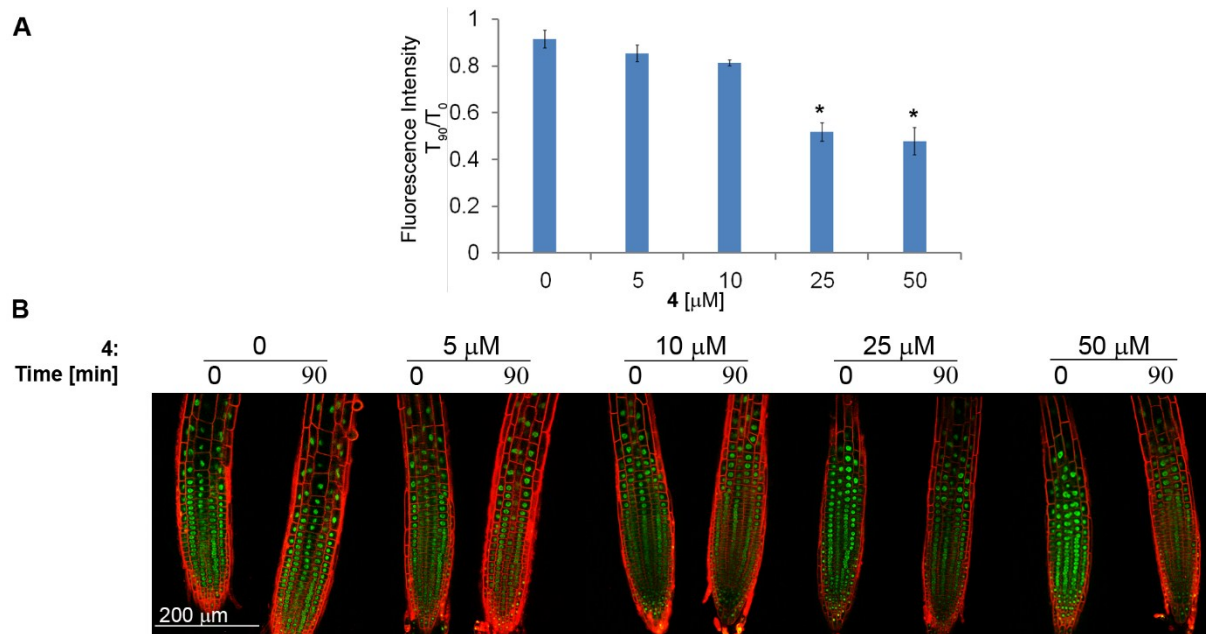

**Figure S3.** Caged GA<sub>4</sub> **4** dark stability *in vivo*. 4 or 5-days old RGA-GFP expressing *Arabidopsis* seedlings (*pRGA:GFP-RGA*) were transferred to MS plates containing paclobutrazol (2 μM) for 1 overnight and incubated with different **4** concentrations (0-50 μM). Confocal images were taken for each concentration at 2 time points after incubation (0 and 90 minutes). A) Quantification of GFP-RGA fluorescence ratio. B) Representative images from A. For each concentration n = 4. Error bars represent SEM. \* represents statistical significance (one-way ANOVA with Tukey correction, p < 0.05) from 0 μM **4**.

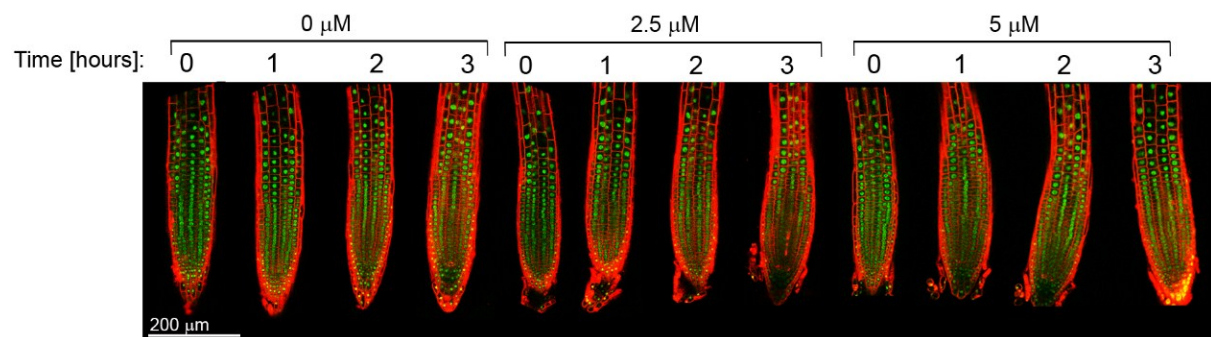

**Figure S4.** Dark stability of **4** *in vivo*. 4 or 5-days old *pRGA:GFP-RGA Arabidopsis* seedlings were transferred to MS plates containing paclobutrazol (2 μM) for 1 overnight and incubated with 0, 2.5 μM or 5 μM of **4**. Confocal images were taken every 1 hour. Representative images of plants treated with each concentration are presented. For each concentration n = 3.

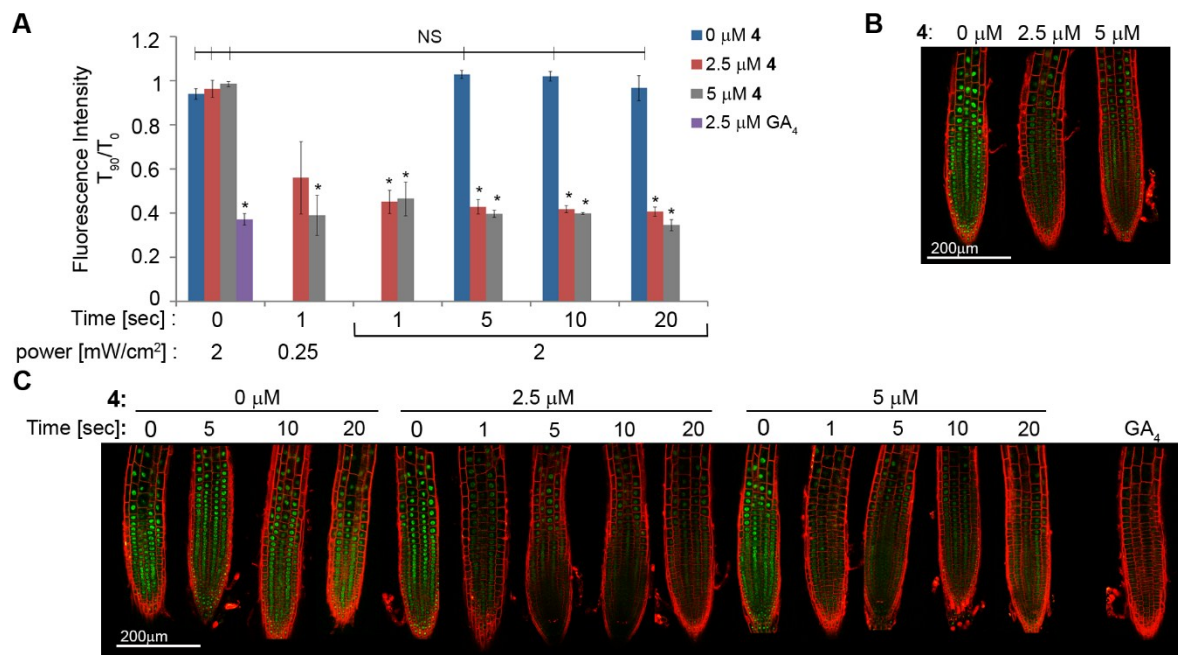

**Figure S5.** Photoactivation of **4** *in vivo*. A-C) 4-days old *pRGA::GFP-RGA* *Arabidopsis* seedlings ( $n \geq 3$ ) were treated with paclo (2  $\mu$ M) overnight, incubated with **4** at indicated concentrations for 25 minutes. A) Seedling roots were irradiated using the confocal lamp (365/10 nm, either 2 or 0.25 mW/cm<sup>2</sup>) for indicated times. Root tips were imaged 90 minutes later. Images were quantified using Zen software measure tool. B-C) Representative images of plants from A. Irradiation power was 0.25 mW/cm<sup>2</sup> in B, and 2 mW/cm<sup>2</sup> in C. Red: PI. Green: GFP-RGA. Error bars represent SEM. \* statistical significance (one-way ANOVA with Tukey correction,  $p < 0.05$ ) from  $T_0$  of 0  $\mu$ M **4**. NS = not statistically significant compared to the control.

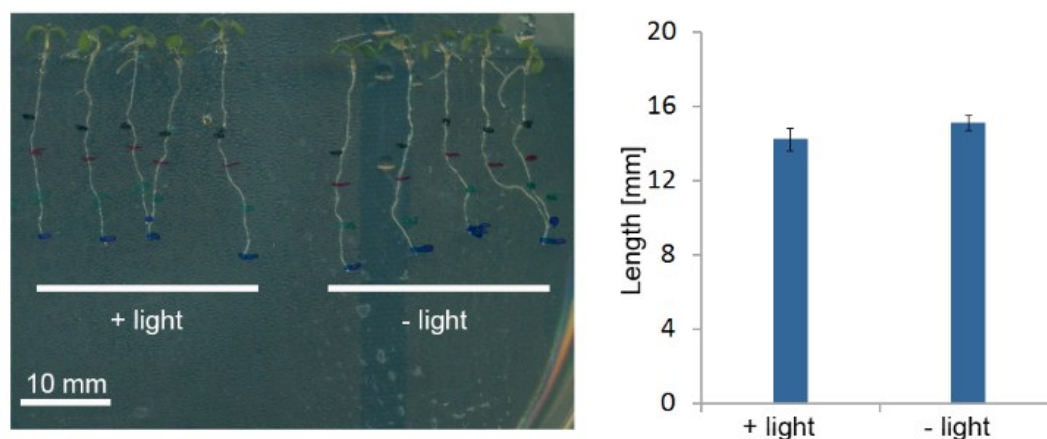

**Figure S6.** Root elongation assay following UV light exposure. *Left*: image of *pRGA::GFP::RGA* seedlings ( $n = 5$ ) irradiated (365/10 nm, 2 mW/cm<sup>2</sup>, 20 sec) or not using the confocal lamp. Roots length was monitored daily for 3 days. *Right*: quantitation of final length for each experimental group. Error bars represent SEM. Two-tailed student's t-test was performed to determine statistical significance, which was found to be not significant (NS,  $p > 0.05$ ).

## General synthetic and analytical methods

GA4/7 mixture was purchased from Duchefa Biochemie. All other chemicals were purchased from SigmaAldrich or TCI and used as received unless otherwise noted. Anhydrous solvents and reagents (THF, DMF) were obtained as SureSeal bottles from Sigma-Aldrich. Thin-layer chromatography and flash chromatography were performed using Merck KGaA pre-coated silica gel 60 F-254 plates and Silicycle silica gel 40-63 (230-400 mesh), respectively. Analytical HPLC-MS (low resolution ESI) were performed on either Waters Alliance e2695 HPLC-MS QDa or Agilent LC/MSD Trap XCT, with Luna C18(2) columns (Phenomenex) using water (solvent A) and acetonitrile (solvent B), both with 0.1% TFA as an additive. High-resolution mass spectra (ESI) were acquired on a Waters SYNAPT instrument.  $^1\text{H}$ - and  $^{13}\text{C}$ -NMR spectra were collected in  $d_6$ -DMSO or  $\text{CDCl}_3$  (Cambridge Isotope Laboratories, Cambridge, MA) at 25 °C using a Bruker Advance III spectrometer at 400 MHz and 100 MHz, respectively. All chemical shifts are reported in the standard  $\delta$  notation of parts per million using the peak of residual proton signals of TMS as an internal reference.

## Synthetic procedures

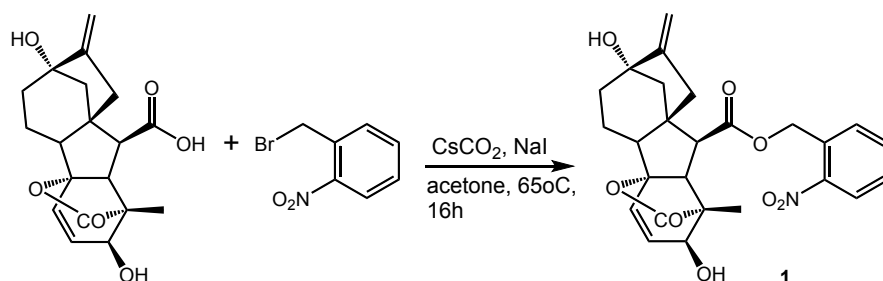

## Caged GA<sub>3</sub> 1

GA<sub>3</sub> (100 mg, 0.29 mmol, 1 eq) was placed in a pressure tube and dissolved in dry acetone (7 mL). 2-Nitrobenzyl bromide (312 mg, 1.45 mmol, 5 eq), CsCO<sub>2</sub> (282 mg, 0.87 mmol, 3 eq) and NaI (173 mg, 1.16 mmol, 4 eq) were added and the mixture was stirred at 65°C for 16 hours. The reaction was diluted with EtOAc (30 mL) and washed with saturated NH<sub>4</sub>Cl solution and brine. The organic layer was dried on MgSO<sub>4</sub>, filtered and solvents were removed under reduced pressure. The residue was dissolved in a minimal amount of DCM and purified by flash chromatography on a silica gel column (eluent Hex:EtOAc 3:1 to 2:3). Caged GA<sub>3</sub> 1 was obtained as a white solid (101 mg, 73% yield).  $^1\text{H}$ -NMR (400 MHz)  $\delta$  = 8.09 (1H, dd,  $J_1$  = 8.2 Hz,  $J_2$  = 1.2 Hz), 7.68 (1H, dt,  $J_1$  = 7.5 Hz,  $J_2$  = 1.1 Hz), 7.59 (1H, dd,  $J_1$  = 7.5 Hz,  $J_2$  = 1.1 Hz), 7.55 (1H, dt,  $J_1$  = 8.2 Hz,  $J_2$  = 1.3 Hz), 6.33 (1H, d,  $J$  = 9.3 Hz), 5.92 (1H, dd,  $J_1$  = 9.3 Hz,  $J_2$  = 3.7 Hz), 5.55 (2H, q,  $J$  = 16.9 Hz), 5.29 (1H, m), 4.95 (1H, s), 4.17 (1H, d,  $J$  = 3.6 Hz), 3.22 (1H, d,  $J$  = 10.8 Hz), 2.87 (1H, d,  $J$  = 10.8 Hz), 2.21-2.18 (2H, m), 2.17-2.04 (3H, m), 1.97-1.93 (2H, m), 1.74-1.63 (4H, m), 1.26 (3H, s).  $^{13}\text{C}$ -NMR (100MHz)  $\delta$  = 178.4, 171.5, 156.7, 147.9, 133.8, 132.7,

132.5, 130.8, 130.0, 129.5, 125.2, 107.7, 90.4, 78.1, 69.7, 63.9, 53.4, 52.8, 51.1, 50.7, 50.5, 44.8, 42.9, 38.0, 17.0, 14.5. HRMS  $C_{26}H_{27}NO_8Na$  expected: 504.1634, found: 504.1632.

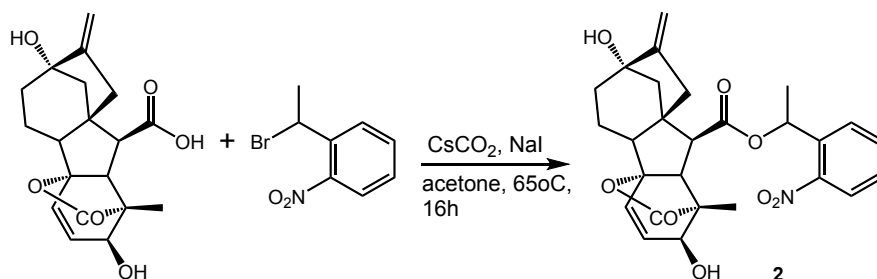

### Caged GA<sub>3</sub> 2

GA<sub>3</sub> (100 mg, 0.29 mmol, 1 eq) was placed in a pressure tube and dissolved in dry acetone (7 mL). 1-(1-Bromoethyl)-2-nitrobenzene [synthesized according to a published procedure<sup>1</sup> (332 mg, 1.45 mmol, 5 eq), CsCO<sub>2</sub> (282 mg, 0.87 mmol, 3 eq) and NaI (173 mg, 1.16 mmol, 4 eq) were added and the mixture was stirred at 65°C for 16 hours. The reaction was diluted with EtOAc (30 mL) and washed with saturated NH<sub>4</sub>Cl solution and brine. The organic layer was dried on MgSO<sub>4</sub>, filtered and solvents were removed under reduced pressure. The residue was dissolved in a minimal amount of DCM and purified by flash chromatography on a silica gel column (eluent Hex:EtOAc 3:1 to 2:3). Caged GA<sub>3</sub> 2 was obtained as a white solid (74 mg, 52% yield) of two diastereoisomers. <sup>1</sup>H-NMR (400 MHz)  $\delta$  = 7.97-7.94 (1H, m), 7.65-7.59 (2H, m), 7.49-7.44 (1H, m), 6.45-6.29 (2H, m), 5.92-5.86 (1H, m), 5.30 and 5.21 (1H, m), 5.00 and 4.82 (1H, s), 4.13 (1H, q,  $J$  = 7.2 Hz), 3.19 and 3.11 (1H, d,  $J$  = 10.8 Hz), 2.81 and 2.79 (1H, d,  $J$  = 10.8 Hz), 2.21-2.04 (4H, m), 1.97-1.63 (6H, m), 1.28 and 1.26 (3H, s). <sup>13</sup>C-NMR (100MHz)  $\delta$  = 178.6, 171.3, 156.7, 148.1, 148.0, 137.3, 136.7, 133.7, 133.5, 132.7, 129.0, 128.9, 128.0, 127.2, 124.6, 107.9, 107.3, 90.5, 78.2, 69.8, 69.2, 68.8, 60.6, 53.6, 53.4, 52.9, 51.6, 51.2, 51.0, 50.7, 45.1, 43.1, 42.9, 38.4, 38.2, 29.8, 22.0, 21.9, 21.1, 17.1, 14.6, 14.3. HRMS  $C_{27}H_{29}NO_8Na$  expected: 518.1791, found: 518.1794.

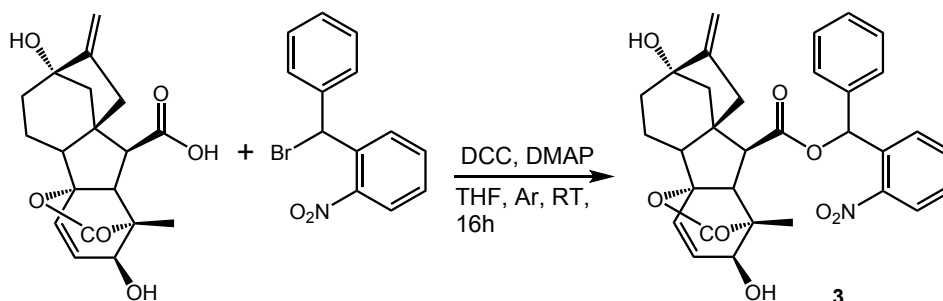

### Caged GA<sub>3</sub> 3

GA<sub>3</sub> (456 mg, 1.31 mmol, 1.9 eq) was dissolved in dry THF (10 mL) under argon atmosphere. (2-nitrophenyl)-phenyl-methanol [synthesized according to a published procedure<sup>2</sup> (159 mg, 0.69 mmol, 1eq), DCC (207 mg, 1 ml, 1.45 eq) and DMAP (119 mg, 0.97 mmol, 1.4 eq) were added and the mixture was stirred at room temperature for 16 hours. The reaction was diluted with EtOAc (40 mL) and washed with saturated NH<sub>4</sub>Cl solution and brine. The organic layer was dried on MgSO<sub>4</sub>, filtered and solvents were removed under reduced pressure. The residue was dissolved in a minimal amount of DCM and purified by flash chromatography on a silica gel column (eluent Hex:EtOAc 85:15 to 3:2). Caged GA<sub>3</sub> **3** was obtained as a white solid (215 mg, 56% yield) of two diastereoisomers. <sup>1</sup>H-NMR (400 MHz) δ = 8.00 (1H, t, *J* = 7.5 Hz), 7.70-7.62 (2H, m), 7.58 (1H, d, *J* = 9.4 Hz), 7.58-7.48 (1H, m), 7.42-7.33 (4H, m), 6.31 (1H, d, *J* = 9.3 Hz), 5.90 (1H, dd, *J*<sub>1</sub> = 9.3 Hz, *J*<sub>2</sub> = 3.7 Hz), 5.21 (1H, m), 4.82 (1H, s), 4.14 (1H, d, *J* = 3.6 Hz), 3.21 and 3.18 (1H, d, *J* = 10.8 Hz), 2.85 (1H, dd, *J*<sub>1</sub> = 10.8 Hz, *J*<sub>2</sub> = 3.5 Hz), 2.09-1.64 (11H, m), 1.08 and 1.06 (3H, s). <sup>13</sup>C-NMR (100MHz) δ = 178.4, 178.3, 170.7, 156.6, 256.5, 148.5, 148.2, 137.6, 137.5, 134.6, 134.3, 133.4, 133.2, 132.8, 132.4, 129.4, 129.2, 129.0, 128.8, 128.7, 128.6, 128.5, 127.9, 127.6, 124.9, 107.4, 107.3, 90.3, 90.2, 78.2, 78.1, 73.2, 73.0, 69.7, 53.4, 53.3, 52.8, 51.4, 50.9, 50.6, 50.4, 44.9, 42.7, 42.5, 37.9, 37.8, 16.9, 14.43, 14.39. HRMS C<sub>32</sub>H<sub>31</sub>NO<sub>8</sub>Na expected: 580.1947, found: 580.1945.

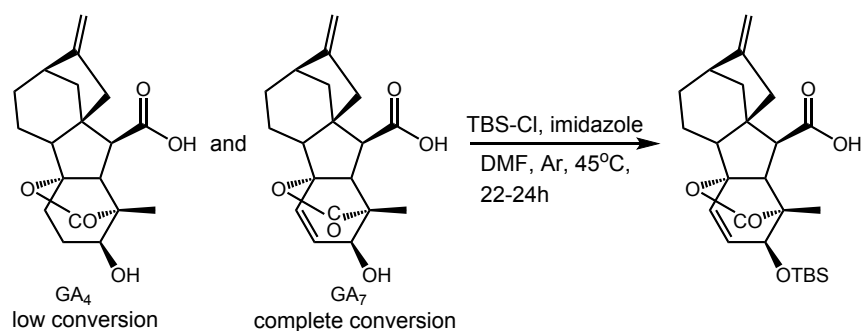

### Purification of GA<sub>4</sub> from a GA<sub>4/7</sub> mixture

GA<sub>4</sub> was isolated from a commercially available mixture of GA<sub>4/7</sub> by a modified published procedure<sup>3</sup>. The separation relies on the differences in reactivities of the 3b-hydroxy in GA<sub>4</sub> (secondary alcohol) and GA<sub>7</sub> (secondary allylic alcohol). In brief, a 63:35 mixture of commercial (Duchefa) GA<sub>4</sub>/GA<sub>7</sub> mixture (0.587 g, 1.67 mmol, 1eq) was dissolved in dry DMF (2.5 mL) under argon atmosphere. Imidazole (1.13 g, 16.7 mmol, 10 eq) was added at room temperature. After the imidazole completely dissolved, tert-butyldimethylsilyl chloride (1.26 g, 8.33 mmol, 5 eq) was added at room temperature and the reaction mixture was heated to 45 °C. The reaction progress was monitored by HPLC-MS. Upon complete consumption of GA<sub>7</sub>, (approximately 22-24 hours) the mixture was diluted with EtOAc (30 mL) and washed with sat. NH<sub>4</sub>Cl three times. The organic layer was dried on MgSO<sub>4</sub>, filtered and solvents removed under reduced pressure. The residue was dissolved in a minimal amount of DCM and purified by flash chromatography on a silica gel column (eluent Hex:EtOAc 3:2). First to elute is a mixture of silylated GA<sub>4</sub>/GA<sub>7</sub>. Second to elute

is the unreacted GA<sub>4</sub>. Column fractions were analyzed via silica TLC plates using iodine staining and with HPLC-MS. GA<sub>4</sub> (0.231 gr, 63% yield) was obtained as a white powder.

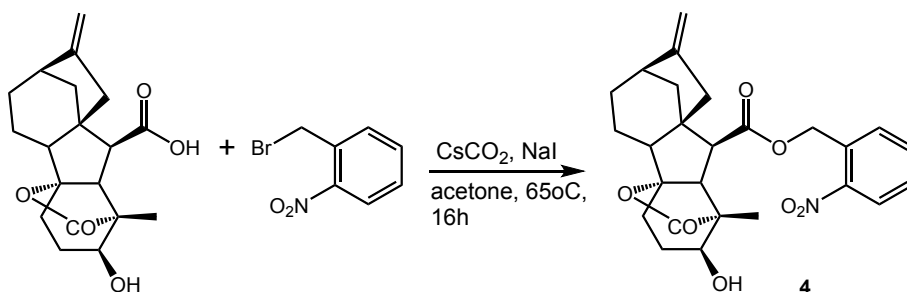

### Caged GA<sub>4</sub> 4

GA<sub>4</sub> (50 mg, 0.15 mmol, 1 eq) was placed in a pressure tube and dissolved in dry acetone (7 mL). 2-Nitrobenzyl bromide (164 mg, 0.75 mmol, 5 eq), CsCO<sub>2</sub> (148 mg, 0.45 mmol, 3 eq) and NaI (91 mg, 0.61 mmol, 4 eq) were added and the mixture was stirred at 65°C for 16 hours. The reaction was diluted with EtOAc (30 mL) and washed with saturated NH<sub>4</sub>Cl solution and brine. The organic layer was dried on MgSO<sub>4</sub>, filtered and solvents were removed under reduced pressure. The residue was dissolved in a minimal amount of DCM and purified by flash chromatography on a silica gel column (eluent Hex:EtOAc 4:1 to 3:2). Caged GA<sub>4</sub> 4 was obtained as a white solid (57 mg, 81% yield). <sup>1</sup>H-NMR (400 MHz) δ = 8.10 (1H, dd, *J*<sub>1</sub> = 8.2 Hz, *J*<sub>2</sub> = 1.2 Hz), 7.66 (1H, dt, *J*<sub>1</sub> = 7.7 Hz, *J*<sub>2</sub> = 1.3 Hz), 7.59 (1H, dd, *J*<sub>1</sub> = 7.5 Hz, *J*<sub>2</sub> = 1.1 Hz), 7.50 (1H, dt, *J*<sub>1</sub> = 8.2 Hz, *J*<sub>2</sub> = 1.5 Hz), 5.58 (1H, d, *J* = 14.4 Hz), 5.46 (1H, d, *J* = 14.4 Hz), 4.96 (1H, d, *J* = 1.2 Hz), 4.83 (1H, s), 3.84 (1H, d, *J* = 1.1 Hz), 3.21 (1H, d, *J* = 10.8 Hz), 2.78 (1H, d, *J* = 10.8 Hz), 2.63 (1H, t, *J* = 7.0 Hz), 2.15-1.48 (13H, m), 1.42-1.33 (1H, m), 1.14 (3H, s). <sup>13</sup>C-NMR (100MHz) δ = 178.3, 172.1, 156.5, 147.7, 133.8, 131.4, 129.5, 129.1, 125.1, 107.6, 94.1, 70.1, 63.4, 54.4, 53.7, 51.6, 51.5, 51.1, 44.5, 38.8, 36.8, 31.3, 28.0, 27.3, 16.1, 14.7. HRMS C<sub>27</sub>H<sub>29</sub>NO<sub>8</sub>Na expected: 490.1842, found: 490.1844.



## **Plant material, growth conditions and chemicals application**

*Arabidopsis thaliana* seeds (Col-0, unless otherwise noted) were stratified for 2-days at 4 °C and plated on medium containing 1/2× Murashige-Skoog (MS) medium, 1% sucrose, and 1% agar (both w/v) on vertical plates at 22 °C, under short-day fluorescent light (8 h light/16 h dark). All *Arabidopsis* lines are Col-0 unless specifically stated otherwise. The following *Arabidopsis* transgenic plants and mutants were previously described: *gal-3<sup>4</sup>* and *pRGA:GFP-RGA<sup>5</sup>*. Chemicals were supplied to the agar medium at concentrations as indicated for each experiment in figure legends (starting from stock solutions of 10 mM in DMSO). Seedlings were placed on agar plates in a way such that the chemical was applied uniformly to the whole root.

### **GA<sub>3</sub> calibration curve**

A stock solution of 10 mM GA<sub>3</sub> in DMSO was serially diluted into ddH<sub>2</sub>O to generate working solution at 1,000, 750, 500, 250, 100, 50 and 25 μM. From each working solution, 20 μL were injected to an HPLC-MS. Area under the peak was calculated and a calibration curve was plotted.

### **GA<sub>3</sub> stability to UV irradiation**

A 2 mL solution of 500 μM GA<sub>3</sub> in ddH<sub>2</sub>O (5% DMSO) was placed in a quartz cuvette. The cuvette was placed on top of a UV transilluminator (UVP, 365 nm, 4 X 8W bulbs) and irradiated for the specified durations. At each time point, a 20 μL sample was taken and analyzed by HPLC-MS (monitored at 215 nm).

### ***In vitro* caged GA<sub>3</sub> photolysis**

A 2 mL solution of **1-3** (1 mM in ddH<sub>2</sub>O (5% DMSO)) was placed in a quartz cuvette. The cuvette was placed on top of a UV transilluminator (UVP, 365 nm, 4 X 8W bulbs) and irradiated for the specified durations. At each time point, a 20 μL sample was taken and analyzed by HPLC-MS (monitored at 215 and 254 nm).

### **Y2H dark stability assay**

DB-GID1a in pLexA-NLS derivative (Trp selection) and AD-RGA in pACTII derivative (Leu selection) fusion constructs (bait and prey constructs) were previously described (11). Bait and prey constructs were co-transformed into *Saccharomyces cerevisiae* strain EGY48 [p8opLacZ] (Clontech) and transformants were selected on SD supplemented with –Ura/–Trp/–Lue/ drop-out solution (BD Biosciences). To test the interaction between GID1a and RGA proteins, transformed yeast colonies were plated on SD–Ura/– Trp/–Lue/ drop out, glucose, 80 μg/ml X-Gal, in the absence or presence of 25 μM of the indicated caged GA (molecules **1**, **2** and **3**) and GA<sub>3</sub>. For pre-irradiation, compounds **1**, **2** and **3** (1 mL of 1 mM in DMSO) were placed in a quartz cuvette and irradiated on a transillumination table (365 nm) for 30 minutes. These irradiated solutions were added to the above mentioned medium for a final concentration of 25 μM. Plates were incubated for 16 hours at 30°C. A control strain, containing the DB-GID1a and an empty vector of the AD (no RGA protein) was used as a negative control.

### ***gal* germination assay**

Ler *gal* mutant seeds (n = 30-50) were sowed on agar plates containing caged GA<sub>3</sub> **1**, **2**, **3** or GA<sub>3</sub> (25 μM) and placed under short-day conditions. Germination was scored under dissecting scope 4 days later.

### **Root elongation assay**

5 days old WT seedlings (Col-0) were transferred onto MS plates containing 2 μM paclobutrazol for 2 days. Subsequently, the seedlings were transferred onto MS plates containing 2 μM paclobutrazol and either caged GA<sub>3</sub> **1**, **2**, **3** or GA<sub>3</sub> (25 μM) and placed under short-day conditions for 4 days. Roots length was marked daily, plates were then scanned at day 4 and root length was measured using the ImageJ software.

### **Root elongation assay after irradiation**

5 days old *pRGA::GFP::RGA* seedlings (n = 5) were grown on MS agar plates and then transferred to MS agar plates containing paclobutrazol (2 μM) for 1 overnight. Subsequently, seedlings were incubated in DDW for 25 minutes in dark and irradiated (365/10 nm, 2 mW/cm<sup>2</sup>, 10 sec) or not using the confocal lamp. Following irradiation, they were placed under short-day conditions in MS agar plates for 3 days, and marked as shown. Final length was measured using the ImageJ software. Results were quantified and average length was calculated for each group (with or without irradiation) as shown in Figure S7.

### **GFP-RGA assay for dark stability *in planta***

4 or 5 days old *pRGA::GFP::RGA* seedlings were grown on MS agar plates and then transferred to MS agar plates containing paclobutrazol (2 μM) for 1 overnight. Then, plants were incubated in dark conditions with either GA<sub>4</sub> or **4** in various concentrations (0-50 μM in DDW, 0.05-0.5% DMSO) for 25 minutes. After incubation plants were and placed on an MS agar containing 10 μg/ml propidium iodide (PI) and imaged at different time points. The first time point (T<sub>0</sub>) was imaged immediately after incubation in the case of **4**. In the case of GA<sub>4</sub>, T<sub>0</sub> is start of incubation time.

### **Photo-activation assay *in planta***

Plants were grown and incubated with **4** concentrations (2.5 μM or 5 μM) as described in “GFP-RGA assay for dark stability *in planta*” above, and following incubation they were placed on an MS agar containing 10 μg/ml PI and irradiated (365/10 nm, 2.0 or 0.25 mW/cm<sup>2</sup>, 10 sec) at different locations of the root tip. Immediately following irradiation, plants were imaged (T<sub>0</sub>) for indicated times, either in time lapse mode or individual time points. Time-lapse images were taken at different time intervals for total time of up to 90 minutes. Root layers across Z-axis were imaged for every time point and acquired via the Z-stack method, that was performed with an average of

3.5  $\mu\text{m}$  between layers, starting from the top epidermal layer to the root center (averaged total depth of 17  $\mu\text{m}$ ).

### **Imaging and confocal microscopy**

Plants were first transferred to a Polymer coated-bottom 35-mm dish (Ibidi) and covered with MS agar containing 10  $\mu\text{g}/\text{ml}$  propidium iodide (PI) with closed lid to prevent drying over time. Then, root tips were imaged with a Zeiss LSM 780 laser spectral scanning confocal microscope (Zeiss, <http://corporate.zeiss.com>), with a 20X air (Plan-Apochromat 20X/0.8 M27) objective. GFP was excited with a 488-nm argon laser, emission was collected with a GaAsP detector set to 472 to 579 nm, with the pinhole closed to 1 Airy unit. PI excitation wavelength was with 561 nm laser and fluorescence emission was collected between 579-718 nm. Bright-field imaging was performed with TPMT module. Irradiation was performed with a 120 W metal-halide lamp HXP Xcite 120, through a 365/10 nm filter, and decreased 10% intensity (to provide 0.25  $\text{mW}/\text{cm}^2$ ) or 45% of the intensity (to provide -  $\text{mW}/\text{cm}^2$ ). The shutter of the lamp was used to irradiate the sample, for different times (seconds) as described.

### **Quantification of fluorescent signal**

To determine the fluorescence profile of RGA-GFP, Z-stack images were acquired using the same confocal settings throughout an experiment from  $T_0$  to  $T_{\text{final}}$ . The analysis was performed with the Zeiss Zen 2.3 blue edition software. Signal intensity of a rectangle region of interest (approximately 25x10  $\mu\text{m}$ ) containing 2 nuclei was quantified. For each time point, at least 6 regions of interest were quantified and then averaged. For time-lapse experiments of every 30 seconds as described in Figure 4, signal intensity was quantified using Fiji software (<http://fiji.sc/fiji>), using the region of interest as the whole root tip (using a closed line tool) and quantified via the Time series analyzer V3 plugin. The number of quantified biological repeats and elected time points for quantification is indicated for each graph in the appropriate figure caption.



Two-tailed student's t-test was performed whenever two groups were compared. Statistical significance was determined at  $P < 0.05$ . When more than two groups were compared, one-way ANOVA with Tukey correction was performed, and statistical significance was determined at  $p < 0.05$ .

### Calculation of GA<sub>4</sub> decay length

The fluorescence signal quantified at the root tip 90 minutes after photoactivation ( $Fl_{t=90}$ ) was divided by the fluorescence signal quantified in the same location before photoactivation ( $Fl_{t=0}$ ) to generate a ratio ranging from 0 to 1 (column  $Fl_{t90/t0}$  in table below). Maximal fluorescence signal (representing no response) was defined by plants that underwent no treatment whereas minimal fluorescence signal (representing maximal response) was defined by plants photoactivated in the monitoring site (distance = 0 mm). Since GFP-RGA is a turn off sensor, the signal was inverted and redefined as  $1 - Fl_{t90/t0}$  (column  $1 - Fl_{t90/t0}$ ), representing  $f(x)$  in Eq.1. Taking a log of both sides of Eq. 1 yields a linear relation of  $x$ :  $\log(f(x)) = -x(\log(10)/L_{apo})$ . We therefore plot  $\text{Log}(1 - Fl_{t90/t0})$  (see table) against  $x$ , the distance between photoactivation location up the root and monitoring site at the root tip (see graph below).  $L_{apo}$  was thus calculated as  $\log(10)$  divided by the slope  $-(-0.6395)$  yielding 1.6 mm.

| Distance<br>x [mm] | $Fl_{t90/t0}$ | $1 - Fl_{t90/t0} =$<br>$f(x)$ | $\text{Log}(1 - Fl_{t90/t0})$<br>$= \text{Log } f(x)$ |
|--------------------|---------------|-------------------------------|-------------------------------------------------------|
| 0                  | 1.62E-08      | 1                             | -7.04203E-09                                          |
| 0.28               | 0.234202      | 0.765798                      | -0.115885516                                          |
| 0.53               | 0.56354       | 0.43646                       | -0.360055248                                          |
| 0.93               | 0.731397      | 0.268603                      | -0.570889402                                          |

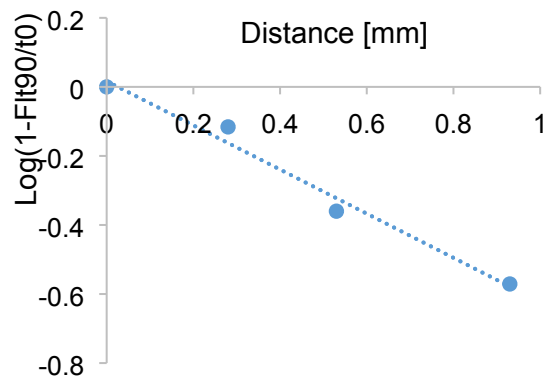

### References

1. M. Su, J. Wang and X. Tang, *Chemistry*, 2012, **18**, 9628-9637.

2. P. J. Serafinowski and P. B. Garland, *J. Am. Chem. Soc.*, 2003, **125**, 962-965.
3. Y. Y. Ku and D. Sawick, *J Agr Food Chem*, 1995, **43**, 801-803.
4. A. L. Silverstone, P. Y. Mak, E. C. Martinez and T. P. Sun, *Genetics*, 1997, **146**, 1087-1099.
5. A. L. Silverstone, H. S. Jung, A. Dill, H. Kawaide, Y. Kamiya and T. P. Sun, *Plant Cell*, 2001, **13**, 1555-1566.

### <sup>1</sup>H- and <sup>13</sup>C-NMR spectra of compounds 1-4

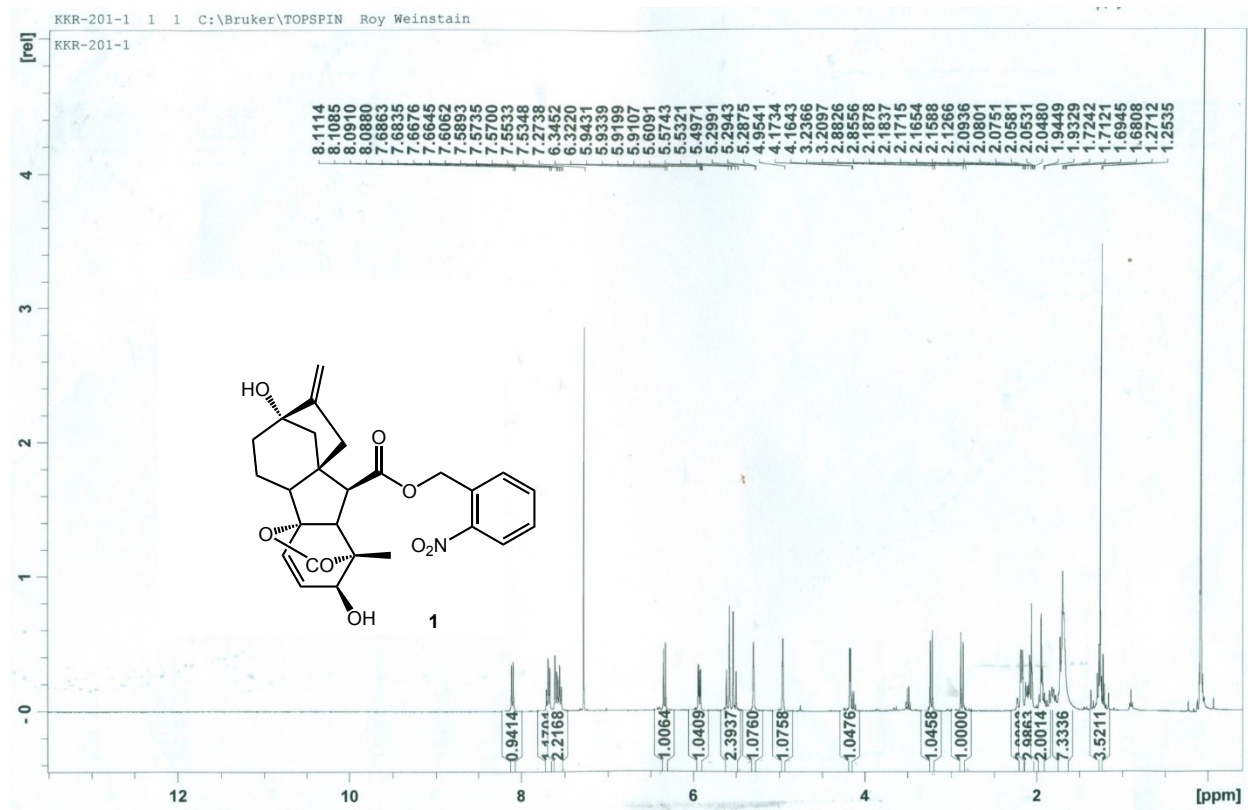

"KKR-201-1 C13" 2 1 C:\Bruker\TOPSPIN Roy Weinstein

KKR-201-1 C13

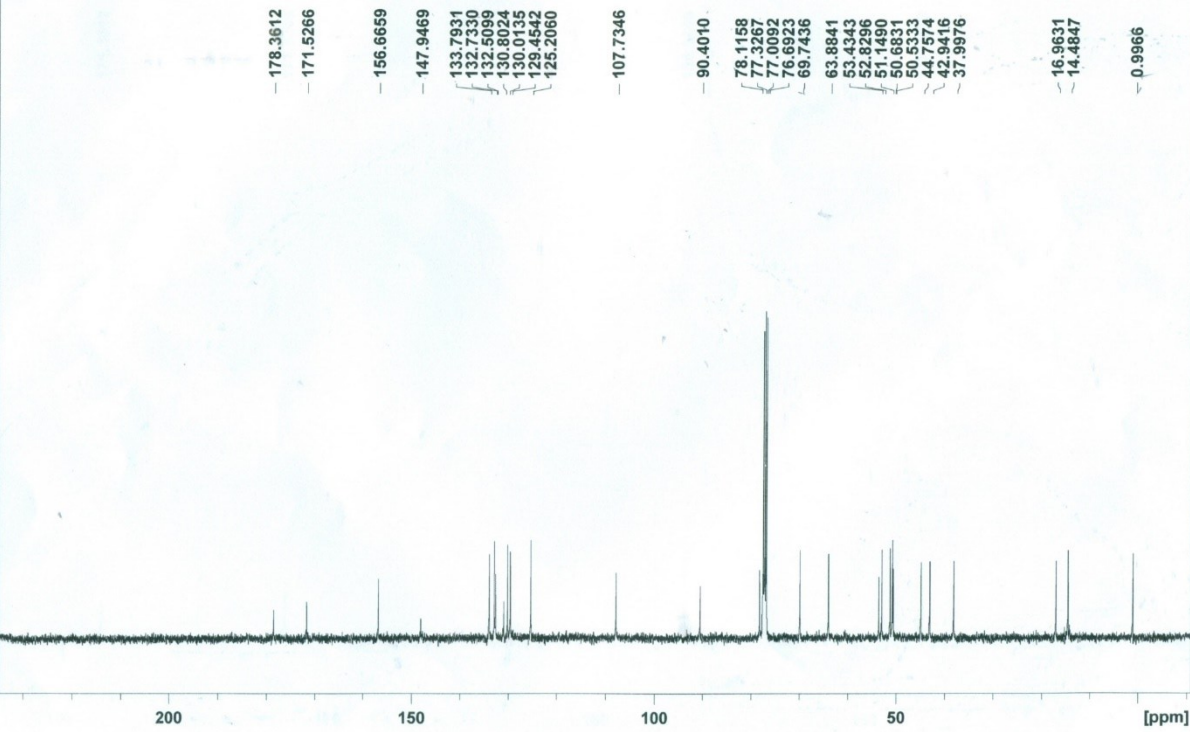

KKR-204 1 1 C:\Bruker\TOPSPIN Roy Weinstein

KKR-204

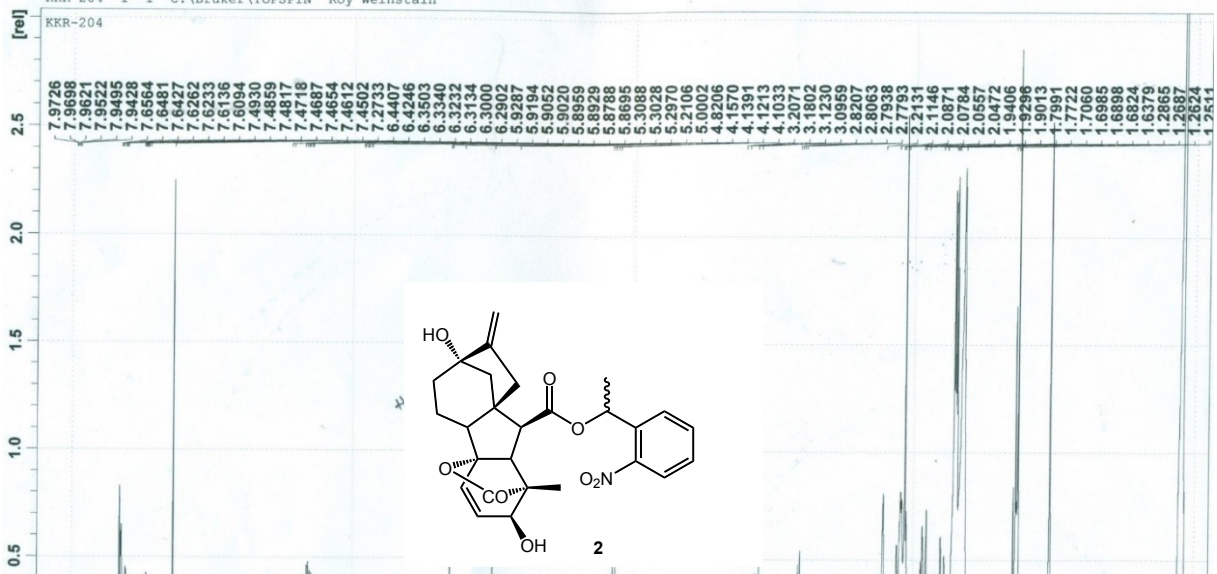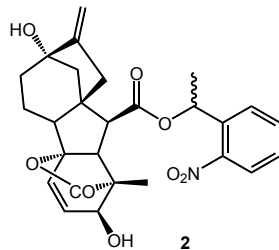



AKC\_13C\_1\_1 F:\Bruker\TopSpin3.0\data\Gozin\nmr  
KKR\_204\_13CNMR\_28062017

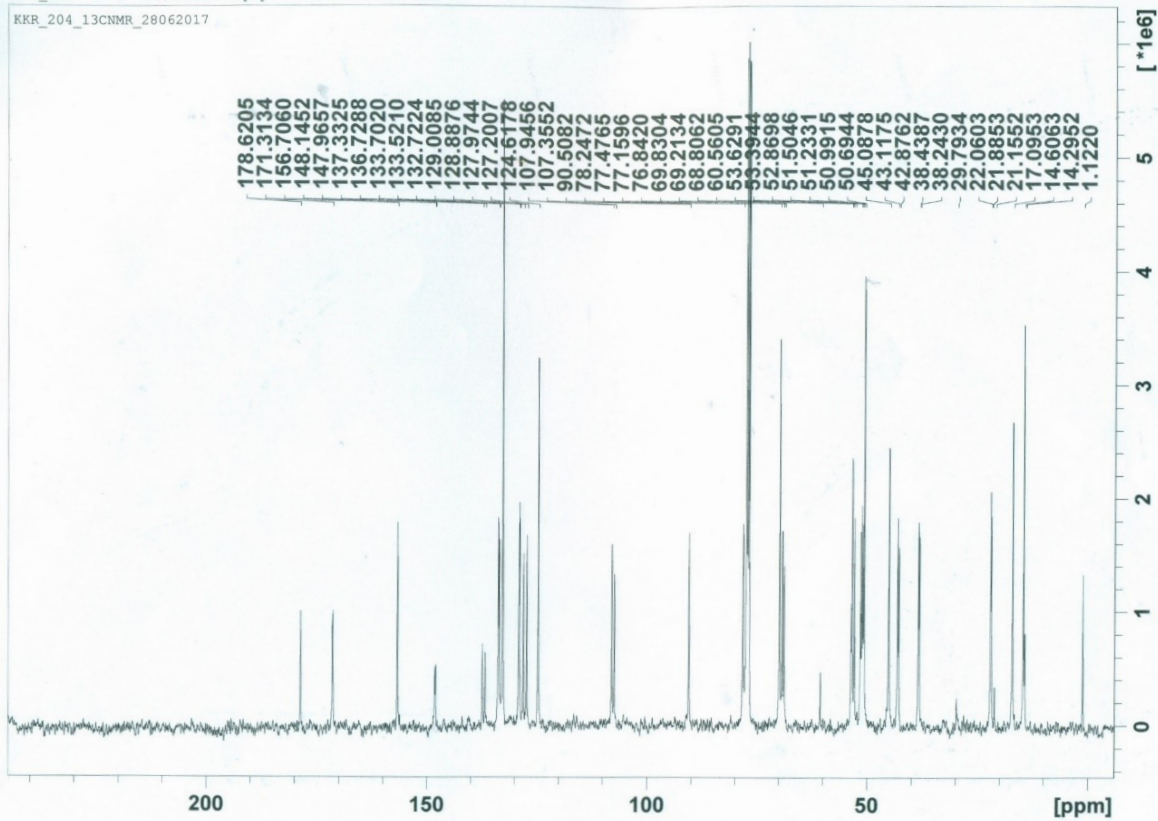

WR-4-59 1 1 C:\Bruker\TOPSPIN Roy Weinstein

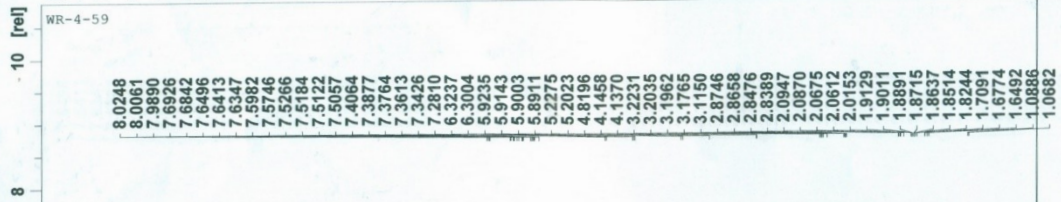



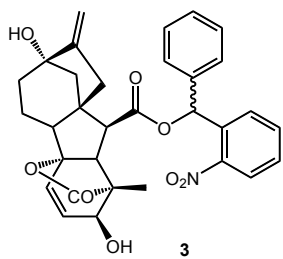

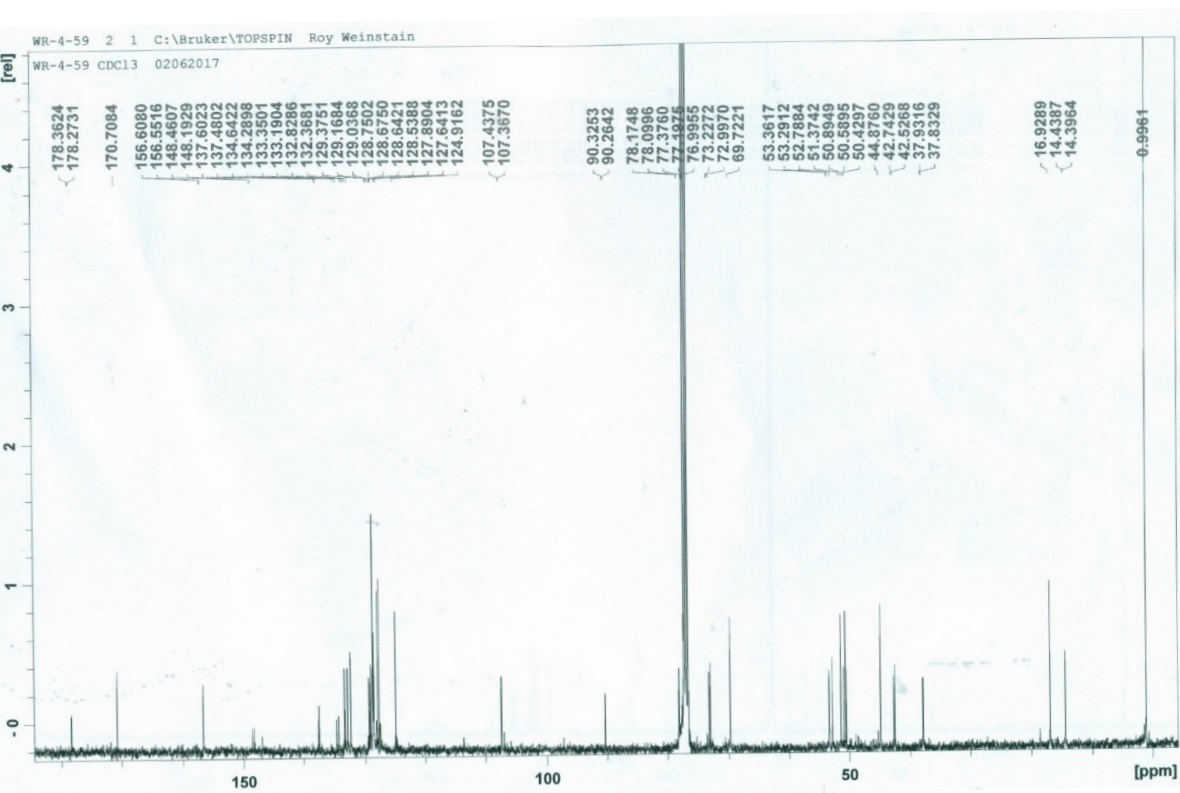

AKC\_1H 1 1 F:\Bruker\TopSpin3.0\data\Gozin\nmr

GA4\_2\_N\_BB\_1H NMR\_28062017

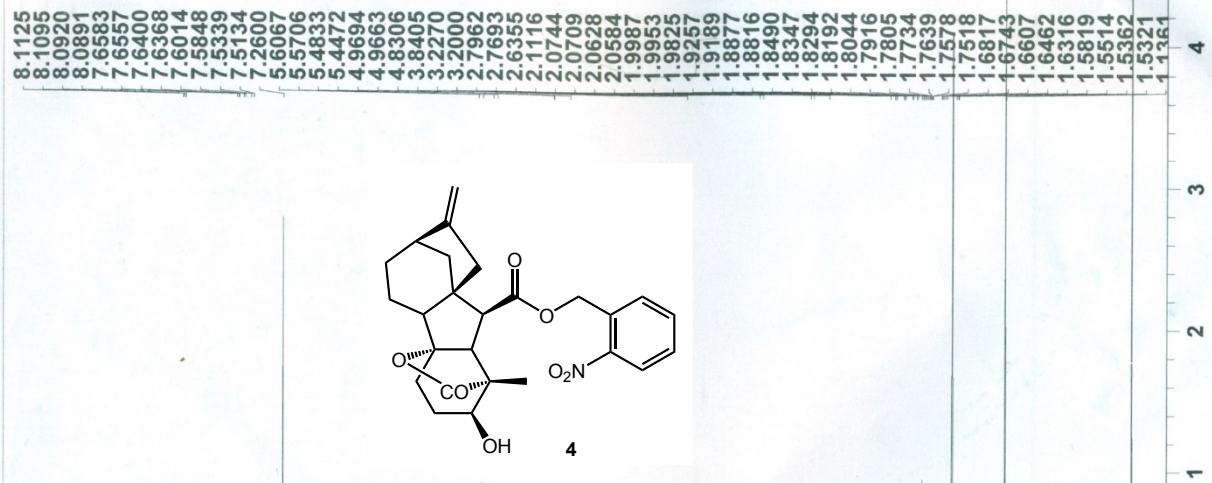

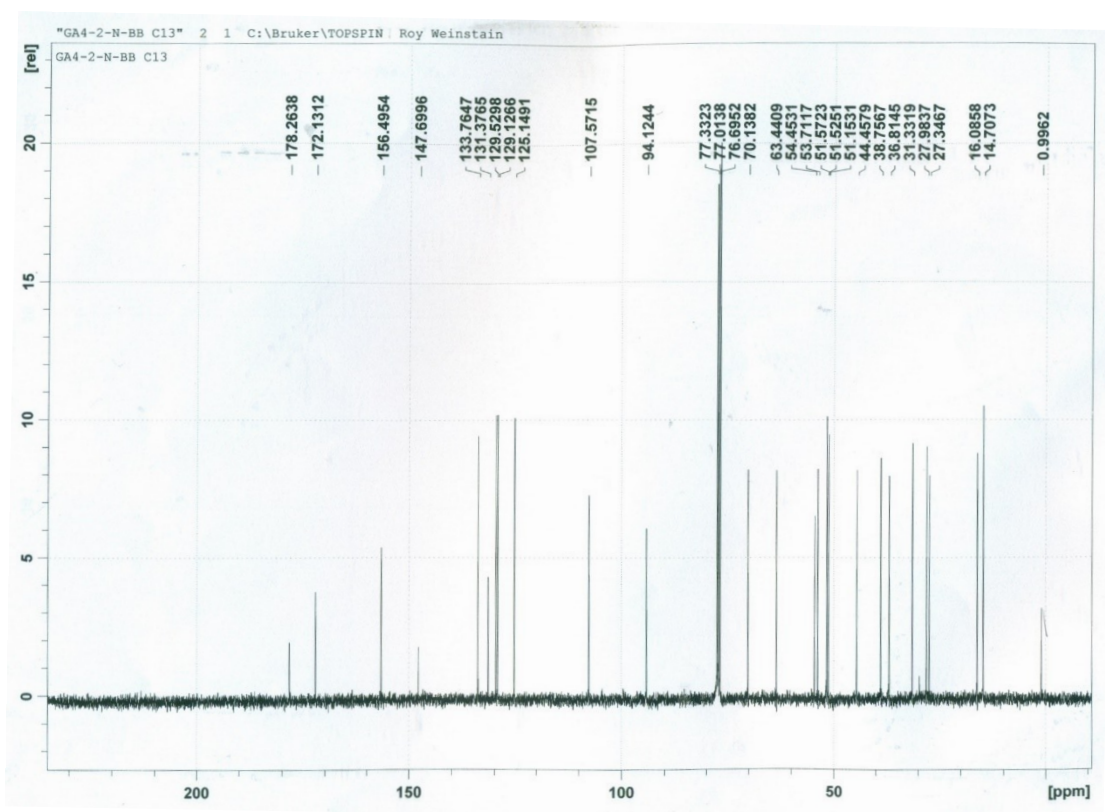

### DFT calculations

DFT calculations were performed using Gaussian 09.2. Geometry optimization of all the molecules, intermediates, and the transition state were carried out using the B3LYP/6-31d basis

sets in water using conductor-like polarizable continuum model (CPCM) implemented in the Gaussian 09 software. Thermal energy corrections were extracted from the results of frequency analysis performed at the same level of theory. Frequency analysis of all the molecules and intermediates contained no imaginary frequency showing that these are energy minima. The transition states geometries gave one imaginary frequency at expected reaction coordinates confirming that it is a first-order saddle point.

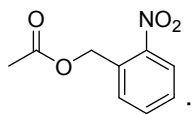

|                                              |             |             |             |
|----------------------------------------------|-------------|-------------|-------------|
| C                                            | 2.97953700  | -1.68752900 | 0.16268500  |
| C                                            | 1.62180300  | -1.88026900 | -0.10112000 |
| C                                            | 0.73855100  | -0.80666200 | -0.25097500 |
| C                                            | 1.28096500  | 0.48499600  | -0.10003900 |
| C                                            | 2.63071600  | 0.69464400  | 0.18675500  |
| C                                            | 3.48631200  | -0.39669400 | 0.30896400  |
| H                                            | 3.63466400  | -2.54730900 | 0.26236900  |
| H                                            | 1.23239700  | -2.88987600 | -0.19105200 |
| H                                            | 2.99518600  | 1.70794800  | 0.29840200  |
| H                                            | 4.53870900  | -0.23528600 | 0.51807900  |
| N                                            | 0.45953700  | 1.69346100  | -0.25541900 |
| O                                            | -0.56479500 | 1.63289400  | -0.93979300 |
| O                                            | 0.84856100  | 2.72714500  | 0.29113600  |
| C                                            | -0.71639800 | -1.10290000 | -0.52709300 |
| H                                            | -1.03222600 | -0.64518300 | -1.46312200 |
| H                                            | -0.85992700 | -2.18537200 | -0.58857600 |
| O                                            | -1.49526500 | -0.59228600 | 0.57906500  |
| C                                            | -2.82466800 | -0.34458800 | 0.45986600  |
| C                                            | -3.49404000 | -0.60157300 | -0.86982600 |
| H                                            | -3.12027100 | 0.09428700  | -1.62918400 |
| H                                            | -3.30672800 | -1.61878600 | -1.22775300 |
| H                                            | -4.56675100 | -0.45021600 | -0.74862500 |
| O                                            | -3.40706100 | 0.07712400  | 1.43735300  |
| <hr/>                                        |             |             |             |
| Sum of electronic and zero-point Energies=   |             |             | -703.764512 |
| Sum of electronic and thermal Energies=      |             |             | -703.751919 |
| Sum of electronic and thermal Enthalpies=    |             |             | -703.750975 |
| Sum of electronic and thermal Free Energies= |             |             | -703.806107 |

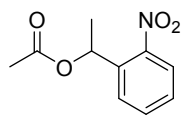

|                                              |             |             |             |
|----------------------------------------------|-------------|-------------|-------------|
| C                                            | 3.16441200  | -1.34597000 | 0.25755300  |
| C                                            | 1.82664700  | -1.67994400 | 0.03000300  |
| C                                            | 0.84079200  | -0.70873700 | -0.17436700 |
| C                                            | 1.27658500  | 0.63261700  | -0.12147300 |
| C                                            | 2.60195900  | 0.98546500  | 0.13351200  |
| C                                            | 3.55695800  | -0.01081800 | 0.31361600  |
| H                                            | 3.89382400  | -2.13731900 | 0.39984000  |
| H                                            | 1.55244800  | -2.72732500 | 0.01628000  |
| H                                            | 2.87095500  | 2.03389800  | 0.17106300  |
| H                                            | 4.59243900  | 0.25821500  | 0.49438200  |
| N                                            | 0.36476400  | 1.76031700  | -0.35661000 |
| O                                            | -0.54996200 | 1.62117900  | -1.17320800 |
| O                                            | 0.58186500  | 2.81053000  | 0.24779200  |
| C                                            | -0.61962900 | -1.10567100 | -0.38387700 |
| H                                            | -0.95139100 | -0.70672300 | -1.34221200 |
| O                                            | -1.36008800 | -0.44765600 | 0.68773900  |
| C                                            | -2.63358100 | 0.00543600  | 0.54288900  |
| C                                            | -3.31625500 | -0.10150800 | -0.80186200 |
| H                                            | -2.80542300 | 0.52424200  | -1.54013700 |
| H                                            | -3.32897000 | -1.12760300 | -1.18009100 |
| H                                            | -4.34204800 | 0.24927300  | -0.68640900 |
| O                                            | -3.16140700 | 0.49791800  | 1.51872300  |
| C                                            | -0.89563800 | -2.60445100 | -0.32136200 |
| H                                            | -0.36412500 | -3.13327100 | -1.11815700 |
| H                                            | -0.60320300 | -3.02384400 | 0.64557500  |
| H                                            | -1.96461400 | -2.78602600 | -0.46002800 |
| Sum of electronic and zero-point Energies=   |             |             | -743.050406 |
| Sum of electronic and thermal Energies=      |             |             | -743.036653 |
| Sum of electronic and thermal Enthalpies=    |             |             | -743.035709 |
| Sum of electronic and thermal Free Energies= |             |             | -743.091454 |

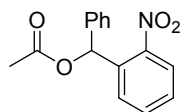

|   |             |             |             |
|---|-------------|-------------|-------------|
| C | -1.35739400 | -3.17279300 | -0.40320800 |
| C | -0.41571200 | -2.16244400 | -0.19012600 |
| C | -0.79269700 | -0.84684300 | 0.09420600  |
| C | -2.17990200 | -0.59187000 | 0.14359800  |
| C | -3.13260900 | -1.58316600 | -0.09272000 |
| C | -2.71969200 | -2.88582700 | -0.35829300 |
| H | -1.01771200 | -4.18239500 | -0.61270700 |
| H | 0.63862300  | -2.40294200 | -0.25030700 |
| H | -4.18369300 | -1.32569700 | -0.05079200 |

|                                              |             |             |             |
|----------------------------------------------|-------------|-------------|-------------|
| H                                            | -3.45802200 | -3.66297100 | -0.52627100 |
| N                                            | -2.72215000 | 0.73470100  | 0.46994500  |
| O                                            | -2.09976600 | 1.45449400  | 1.25600900  |
| O                                            | -3.80013000 | 1.05293200  | -0.03225100 |
| C                                            | 0.25826900  | 0.24883600  | 0.29135800  |
| H                                            | 0.09997900  | 0.68864800  | 1.27599100  |
| O                                            | -0.03932300 | 1.24312400  | -0.72921900 |
| C                                            | 0.26295700  | 2.56327400  | -0.57318200 |
| C                                            | 0.87110800  | 3.02864900  | 0.72780700  |
| H                                            | 0.16010400  | 2.89747900  | 1.55032300  |
| H                                            | 1.77811200  | 2.46843900  | 0.97298700  |
| H                                            | 1.11151200  | 4.08762300  | 0.63127500  |
| O                                            | 0.00822600  | 3.30180300  | -1.50041600 |
| C                                            | 1.69885700  | -0.21607400 | 0.17970600  |
| C                                            | 2.40913600  | -0.54183600 | 1.34203000  |
| C                                            | 2.33173400  | -0.33327700 | -1.06519800 |
| C                                            | 3.73106900  | -0.98487500 | 1.26273300  |
| H                                            | 1.92743800  | -0.44846600 | 2.31250800  |
| C                                            | 3.65490900  | -0.77008600 | -1.14343300 |
| H                                            | 1.78916800  | -0.07574600 | -1.96962100 |
| C                                            | 4.35679300  | -1.09870000 | 0.01950900  |
| H                                            | 4.27209600  | -1.23223600 | 2.17170100  |
| H                                            | 4.13741300  | -0.85353000 | -2.11325400 |
| H                                            | 5.38702100  | -1.43774700 | -0.04314700 |
| Sum of electronic and zero-point Energies=   |             |             | -934.734094 |
| Sum of electronic and thermal Energies=      |             |             | -934.716965 |
| Sum of electronic and thermal Enthalpies=    |             |             | -934.716021 |
| Sum of electronic and thermal Free Energies= |             |             | -934.780868 |

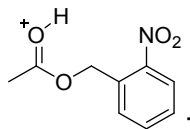

|   |             |             |             |
|---|-------------|-------------|-------------|
| C | 2.88008900  | -1.80663200 | 0.07116800  |
| C | 1.54864600  | -1.86749800 | -0.34527500 |
| C | 0.74504000  | -0.72488600 | -0.40143600 |
| C | 1.33964700  | 0.49908800  | -0.02804600 |
| C | 2.67124900  | 0.57564500  | 0.37692500  |
| C | 3.44174000  | -0.58345900 | 0.43358900  |
| H | 3.47338200  | -2.71441400 | 0.10756900  |
| H | 1.12206600  | -2.82147500 | -0.63895200 |
| H | 3.08548200  | 1.53768600  | 0.64952400  |
| H | 4.47511800  | -0.52502100 | 0.75847100  |
| N | 0.59029600  | 1.76122800  | -0.04928800 |
| O | -0.64551000 | 1.71557000  | -0.08318000 |
| O | 1.22474400  | 2.81290100  | -0.02252400 |
| C | -0.66272500 | -0.88098900 | -0.90093800 |

|                                              |             |             |             |
|----------------------------------------------|-------------|-------------|-------------|
| H                                            | -0.98017700 | -0.06998400 | -1.54810700 |
| H                                            | -0.79737500 | -1.84197500 | -1.39685900 |
| O                                            | -1.56032100 | -0.94134000 | 0.28356900  |
| C                                            | -2.74494600 | -0.46814000 | 0.28339600  |
| C                                            | -3.40739100 | 0.17497300  | -0.88091100 |
| H                                            | -2.88025200 | 1.10587800  | -1.11807800 |
| H                                            | -3.35272900 | -0.48282200 | -1.75326200 |
| H                                            | -4.45158700 | 0.40148000  | -0.66458600 |
| O                                            | -3.32606600 | -0.60858700 | 1.43032100  |
| H                                            | -4.23687000 | -0.25492100 | 1.43297100  |
| Sum of electronic and zero-point Energies=   |             |             | -704.161694 |
| Sum of electronic and thermal Energies=      |             |             | -704.149213 |
| Sum of electronic and thermal Enthalpies=    |             |             | -704.148268 |
| Sum of electronic and thermal Free Energies= |             |             | -704.201344 |

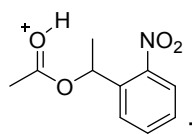

|                                            |             |             |             |
|--------------------------------------------|-------------|-------------|-------------|
| C                                          | 2.83177500  | -1.74183100 | 0.49135700  |
| C                                          | 1.50962100  | -1.80823900 | 0.04814700  |
| C                                          | 0.76444700  | -0.65722900 | -0.22861700 |
| C                                          | 1.42210700  | 0.57870400  | -0.04200700 |
| C                                          | 2.75066300  | 0.65962000  | 0.37434200  |
| C                                          | 3.45687700  | -0.50688100 | 0.65204800  |
| H                                          | 3.36984800  | -2.65987200 | 0.70403800  |
| H                                          | 1.05709000  | -2.78240400 | -0.08951300 |
| H                                          | 3.20828600  | 1.63381000  | 0.49068200  |
| H                                          | 4.48519800  | -0.44628100 | 0.99217000  |
| N                                          | 0.74790500  | 1.86426500  | -0.25994200 |
| O                                          | -0.47970100 | 1.91795800  | -0.11260800 |
| O                                          | 1.43650700  | 2.83719300  | -0.55474700 |
| C                                          | -0.65602000 | -0.78532300 | -0.74682400 |
| H                                          | -0.92100000 | 0.07938000  | -1.34720400 |
| O                                          | -1.52233200 | -0.73805600 | 0.49051500  |
| C                                          | -2.63335500 | -0.11725400 | 0.55598800  |
| C                                          | -3.28979700 | 0.60431700  | -0.56686100 |
| H                                          | -2.71616100 | 1.51220500  | -0.78342400 |
| H                                          | -3.30187300 | -0.01697100 | -1.46546100 |
| H                                          | -4.31207500 | 0.88189600  | -0.30809200 |
| O                                          | -3.15687300 | -0.17708100 | 1.73900200  |
| H                                          | -4.01809800 | 0.28113100  | 1.78777500  |
| C                                          | -0.99833400 | -2.07330000 | -1.47703000 |
| H                                          | -0.32112600 | -2.18916500 | -2.32816200 |
| H                                          | -0.91367500 | -2.94975300 | -0.83144700 |
| H                                          | -2.02045300 | -2.02943800 | -1.86231800 |
| Sum of electronic and zero-point Energies= |             |             | -743.449478 |

Sum of electronic and thermal Energies= -743.435501  
 Sum of electronic and thermal Enthalpies= -743.434557  
 Sum of electronic and thermal Free Energies= -743.490485

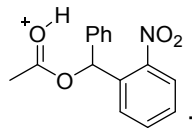

|                                              |             |             |             |
|----------------------------------------------|-------------|-------------|-------------|
| C                                            | -1.56270400 | -2.87240200 | -1.11977000 |
| C                                            | -0.56931700 | -1.94441100 | -0.80174400 |
| C                                            | -0.86380400 | -0.74189400 | -0.15240200 |
| C                                            | -2.21762000 | -0.52034400 | 0.19098000  |
| C                                            | -3.21487500 | -1.45089800 | -0.10148300 |
| C                                            | -2.88874700 | -2.62720700 | -0.76983400 |
| H                                            | -1.29207400 | -3.78785500 | -1.63583000 |
| H                                            | 0.46007100  | -2.16603300 | -1.05575100 |
| H                                            | -4.23525900 | -1.23658100 | 0.18874900  |
| H                                            | -3.66732400 | -3.34348600 | -1.00977700 |
| N                                            | -2.67029300 | 0.69798600  | 0.87677200  |
| O                                            | -1.97073700 | 1.71692600  | 0.80927000  |
| O                                            | -3.73883700 | 0.65708400  | 1.48104000  |
| C                                            | 0.25673400  | 0.23051600  | 0.18087000  |
| H                                            | 0.01640300  | 0.76315300  | 1.09626900  |
| O                                            | 0.21242200  | 1.24193900  | -0.93725600 |
| C                                            | 0.48554100  | 2.47736000  | -0.76620900 |
| C                                            | 0.93753500  | 3.07922300  | 0.51426700  |
| H                                            | 0.10723700  | 3.05082100  | 1.22897000  |
| H                                            | 1.76581600  | 2.49429800  | 0.92469700  |
| H                                            | 1.25241000  | 4.11388200  | 0.37745400  |
| O                                            | 0.33157800  | 3.16459900  | -1.85076700 |
| H                                            | 0.55494000  | 4.10828000  | -1.73257600 |
| C                                            | 1.65607400  | -0.33327200 | 0.26452800  |
| C                                            | 2.14958900  | -0.68272700 | 1.52888400  |
| C                                            | 2.45794800  | -0.52420500 | -0.86976300 |
| C                                            | 3.42501300  | -1.23390100 | 1.65589500  |
| H                                            | 1.53691000  | -0.52701100 | 2.41298800  |
| C                                            | 3.73721600  | -1.06493100 | -0.73587100 |
| H                                            | 2.09167500  | -0.24357400 | -1.85246000 |
| C                                            | 4.22073900  | -1.42470200 | 0.52431000  |
| H                                            | 3.79852300  | -1.50269300 | 2.63941100  |
| H                                            | 4.35468800  | -1.20461300 | -1.61809400 |
| H                                            | 5.21670100  | -1.84611600 | 0.62430200  |
| <hr/>                                        |             |             |             |
| Sum of electronic and zero-point Energies=   |             |             | -935.130762 |
| Sum of electronic and thermal Energies=      |             |             | -935.113408 |
| Sum of electronic and thermal Enthalpies=    |             |             | -935.112463 |
| Sum of electronic and thermal Free Energies= |             |             | -935.177669 |



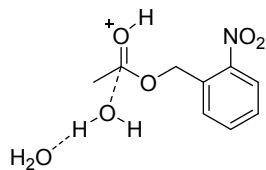

|                                              |             |             |             |
|----------------------------------------------|-------------|-------------|-------------|
| C                                            | -2.96773100 | 2.45995500  | 0.08767000  |
| C                                            | -1.67310200 | 2.05904800  | -0.24821500 |
| C                                            | -1.32184300 | 0.70869800  | -0.33868800 |
| C                                            | -2.33715000 | -0.23789100 | -0.08473400 |
| C                                            | -3.63568800 | 0.14952300  | 0.24469000  |
| C                                            | -3.95018900 | 1.50308800  | 0.33690500  |
| H                                            | -3.20306700 | 3.51734700  | 0.15245100  |
| H                                            | -0.91493500 | 2.80960700  | -0.44889900 |
| H                                            | -4.38188000 | -0.61222500 | 0.42909300  |
| H                                            | -4.95897900 | 1.80274900  | 0.60076700  |
| N                                            | -2.08695800 | -1.68464400 | -0.15859400 |
| O                                            | -0.91878900 | -2.08422700 | -0.20157700 |
| O                                            | -3.05829700 | -2.43958600 | -0.16905700 |
| C                                            | 0.08980300  | 0.37864900  | -0.73324500 |
| H                                            | 0.15008900  | -0.44152500 | -1.44278800 |
| H                                            | 0.60941900  | 1.25824400  | -1.11270500 |
| O                                            | 0.82238100  | -0.00084100 | 0.49609600  |
| C                                            | 1.94680200  | -0.61540600 | 0.44233300  |
| O                                            | 2.51789700  | -0.85725600 | 1.58018000  |
| H                                            | 2.02773100  | -0.43916900 | 2.31993100  |
| H                                            | 3.05112200  | 2.03767500  | 0.58685600  |
| O                                            | 3.12593700  | 1.42719700  | -0.16383200 |
| C                                            | 2.52010300  | -1.28397400 | -0.75175000 |
| H                                            | 1.95193000  | -2.20688600 | -0.92512000 |
| H                                            | 2.44663600  | -0.64910600 | -1.63325500 |
| H                                            | 3.56193300  | -1.53675500 | -0.55891600 |
| H                                            | 5.95633400  | 0.05132900  | 0.43670600  |
| H                                            | 5.98093000  | 0.23538500  | -1.08380700 |
| H                                            | 4.08963300  | 1.20790600  | -0.20973600 |
| O                                            | 5.78784400  | 0.70818600  | -0.25808900 |
| Sum of electronic and zero-point Energies=   |             |             | -856.970776 |
| Sum of electronic and thermal Energies=      |             |             | -856.951824 |
| Sum of electronic and thermal Enthalpies=    |             |             | -856.950880 |
| Sum of electronic and thermal Free Energies= |             |             | -857.020596 |

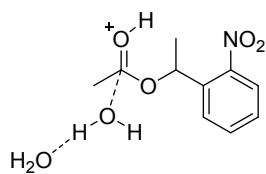

|                                              |             |             |             |
|----------------------------------------------|-------------|-------------|-------------|
| C                                            | -1.75467700 | 2.85144800  | -0.25250200 |
| C                                            | -0.80252600 | 1.89312600  | -0.60512900 |
| C                                            | -1.02225600 | 0.51996900  | -0.43209200 |
| C                                            | -2.26545400 | 0.15115900  | 0.12716300  |
| C                                            | -3.23285000 | 1.09703200  | 0.46695300  |
| C                                            | -2.97762500 | 2.45311100  | 0.28087600  |
| H                                            | -1.53520100 | 3.90408300  | -0.39948900 |
| H                                            | 0.14574700  | 2.21719100  | -1.02124500 |
| H                                            | -4.17025900 | 0.75795400  | 0.88934100  |
| H                                            | -3.72832800 | 3.18548400  | 0.55855200  |
| N                                            | -2.62154100 | -1.24212900 | 0.43254100  |
| O                                            | -1.71565700 | -2.03114200 | 0.70750800  |
| O                                            | -3.81498600 | -1.54500300 | 0.42571200  |
| C                                            | 0.07382800  | -0.38953900 | -0.96082400 |
| H                                            | 0.80798800  | 0.26111000  | -1.43066400 |
| O                                            | 0.77985900  | -0.95835000 | 0.23474600  |
| C                                            | 2.04743400  | -1.13465100 | 0.27923400  |
| O                                            | 2.52918300  | -1.47490800 | 1.43529100  |
| H                                            | 1.83274700  | -1.45332900 | 2.12561200  |
| H                                            | 2.11784400  | 1.64915200  | 1.12115800  |
| O                                            | 2.45381300  | 1.30095000  | 0.28018100  |
| C                                            | 2.98778400  | -1.23646000 | -0.86624700 |
| H                                            | 3.01638500  | -2.28809300 | -1.17808200 |
| H                                            | 2.68240000  | -0.62152700 | -1.70973100 |
| H                                            | 3.98440400  | -0.94482400 | -0.53588600 |
| H                                            | 5.60615500  | 0.94248700  | 0.94457600  |
| H                                            | 5.61040600  | 1.47372500  | -0.49414300 |
| H                                            | 3.42969800  | 1.45612100  | 0.31601200  |
| O                                            | 5.19372800  | 1.60916400  | 0.37214200  |
| C                                            | -0.32200400 | -1.49910200 | -1.92325700 |
| H                                            | 0.56862200  | -1.99161200 | -2.32317100 |
| H                                            | -0.95801400 | -2.25006000 | -1.45717200 |
| H                                            | -0.85726000 | -1.04521300 | -2.76314800 |
| Sum of electronic and zero-point Energies=   |             |             | -896.254559 |
| Sum of electronic and thermal Energies=      |             |             | -896.233967 |
| Sum of electronic and thermal Enthalpies=    |             |             | -896.233023 |
| Sum of electronic and thermal Free Energies= |             |             | -896.305979 |

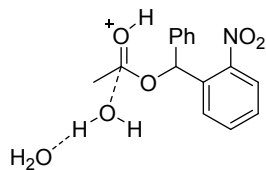

|                                            |             |             |              |
|--------------------------------------------|-------------|-------------|--------------|
| C                                          | -2.44560100 | -2.15867400 | -1.53994700  |
| C                                          | -1.70329700 | -0.98274400 | -1.40617500  |
| C                                          | -0.69961500 | -0.84537400 | -0.43788000  |
| C                                          | -0.47557300 | -1.95689800 | 0.39864700   |
| C                                          | -1.18958500 | -3.14566300 | 0.26076800   |
| C                                          | -2.18509200 | -3.24612600 | -0.70850000  |
| H                                          | -3.21720000 | -2.22171300 | -2.30059000  |
| H                                          | -1.90706400 | -0.14452700 | -2.06482700  |
| H                                          | -0.96955500 | -3.97134000 | 0.92622300   |
| H                                          | -2.75057900 | -4.16678700 | -0.80628500  |
| N                                          | 0.49415800  | -1.92369800 | 1.49953100   |
| O                                          | 0.64007300  | -0.86211400 | 2.10543500   |
| O                                          | 1.08396400  | -2.96775500 | 1.77879100   |
| C                                          | 0.09979200  | 0.44965700  | -0.47715400  |
| H                                          | -0.22513100 | 0.96874500  | -1.37797900  |
| O                                          | -0.38370300 | 1.29674700  | 0.64539200   |
| C                                          | -0.52424500 | 2.57140600  | 0.53516500   |
| O                                          | -1.11737400 | 3.15612600  | 1.52643300   |
| H                                          | -1.46217400 | 2.50138800  | 2.17074500   |
| H                                          | -2.79227300 | 3.08950400  | -1.33175600  |
| O                                          | -2.38466600 | 2.26940400  | -1.01139500  |
| C                                          | 0.14303300  | 3.45967000  | -0.44922500  |
| H                                          | 1.16346700  | 3.64222400  | -0.08903700  |
| H                                          | 0.19603000  | 3.01079700  | -1.43903800  |
| H                                          | -0.38868000 | 4.40972200  | -0.49372900  |
| H                                          | -4.22377600 | -0.06220800 | 0.06207700   |
| H                                          | -4.04348000 | 0.83007500  | 1.29144600   |
| H                                          | -3.10587800 | 1.80012000  | -0.52041400  |
| O                                          | -4.30971800 | 0.85890700  | 0.35792200   |
| C                                          | 1.61533600  | 0.33218700  | -0.49155800  |
| C                                          | 2.19415100  | -0.28927500 | -1.60804600  |
| C                                          | 2.44171900  | 0.84424000  | 0.51356100   |
| C                                          | 3.57971600  | -0.40282400 | -1.71137300  |
| H                                          | 1.56278500  | -0.68524500 | -2.39923400  |
| C                                          | 3.83035000  | 0.73570100  | 0.40197900   |
| H                                          | 2.01393500  | 1.31368000  | 1.39173100   |
| C                                          | 4.40293100  | 0.11186400  | -0.70638300  |
| H                                          | 4.01429600  | -0.88778800 | -2.58054100  |
| H                                          | 4.46082900  | 1.13798200  | 1.18952700   |
| H                                          | 5.48263200  | 0.02784900  | -0.78893200  |
| <hr/>                                      |             |             |              |
| Sum of electronic and zero-point Energies= |             |             | -1087.933543 |
| Sum of electronic and thermal Energies=    |             |             | -1087.909926 |

Sum of electronic and thermal Enthalpies= -1087.908982  
 Sum of electronic and thermal Free Energies= -1087.988558

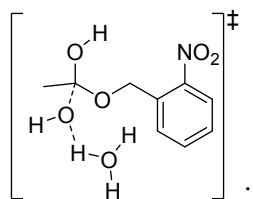

|   |             |             |             |
|---|-------------|-------------|-------------|
| C | 3.24884300  | -1.89416900 | -0.15096700 |
| C | 1.95477400  | -1.82167900 | -0.67186600 |
| C | 1.21779800  | -0.63398800 | -0.65054200 |
| C | 1.83336600  | 0.48421400  | -0.05480500 |
| C | 3.11392200  | 0.42200400  | 0.49497300  |
| C | 3.83003600  | -0.77089300 | 0.43581100  |
| H | 3.79399500  | -2.83169600 | -0.19640700 |
| H | 1.50136000  | -2.70865700 | -1.10387200 |
| H | 3.53822500  | 1.30917800  | 0.94824600  |
| H | 4.83259400  | -0.81773500 | 0.84805700  |
| N | 1.16727400  | 1.79283400  | 0.00784500  |
| O | 0.34928700  | 2.08290500  | -0.86822300 |
| O | 1.48125000  | 2.55303400  | 0.92456900  |
| C | -0.17776100 | -0.63811400 | -1.22297000 |
| H | -0.27859100 | 0.09757100  | -2.02100500 |
| H | -0.41481900 | -1.63203900 | -1.61182000 |
| O | -1.09267800 | -0.31346000 | -0.14356800 |
| C | -2.43188700 | -0.19094900 | -0.47020200 |
| O | -3.00596500 | 0.34588300  | 0.85093300  |
| H | -2.76427600 | 1.28914400  | 0.95957200  |
| H | -2.64367300 | -2.07580700 | -0.15980100 |
| O | -3.05537500 | -1.37818700 | -0.70211800 |
| C | -2.80824700 | 0.81837500  | -1.53454200 |
| H | -2.29870700 | 1.76836900  | -1.35910800 |
| H | -2.51994700 | 0.43471400  | -2.51528700 |
| H | -3.89023900 | 0.96499800  | -1.52808700 |
| H | -2.60082100 | -0.19442800 | 1.72662200  |
| H | -2.61220600 | -1.58292800 | 3.09143600  |
| H | -1.19096000 | -1.12868900 | 2.64885700  |
| O | -2.09000900 | -0.80150400 | 2.83445100  |

Sum of electronic and zero-point Energies= -856.960075  
 Sum of electronic and thermal Energies= -856.943720  
 Sum of electronic and thermal Enthalpies= -856.942776  
 Sum of electronic and thermal Free Energies= -857.005373

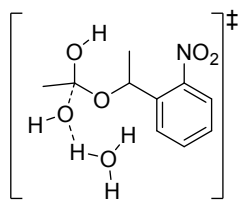

|                                              |             |             |             |
|----------------------------------------------|-------------|-------------|-------------|
| C                                            | -3.58053400 | -1.34332900 | -0.37321200 |
| C                                            | -2.30574800 | -1.67724000 | 0.08491400  |
| C                                            | -1.31439800 | -0.71010500 | 0.29361200  |
| C                                            | -1.66779700 | 0.61803000  | -0.00775400 |
| C                                            | -2.92303600 | 0.96611900  | -0.51169500 |
| C                                            | -3.89178300 | -0.01780500 | -0.67754800 |
| H                                            | -4.32137200 | -2.12454500 | -0.51052600 |
| H                                            | -2.06658500 | -2.71918600 | 0.27755200  |
| H                                            | -3.12999600 | 2.00348200  | -0.74672100 |
| H                                            | -4.87569500 | 0.25017400  | -1.04765400 |
| N                                            | -0.73374500 | 1.73248100  | 0.16963700  |
| O                                            | -0.05103200 | 1.76835200  | 1.20450100  |
| O                                            | -0.68601600 | 2.59271400  | -0.70354300 |
| C                                            | 0.03780600  | -1.20693000 | 0.78960900  |
| H                                            | 0.15356800  | -2.23114000 | 0.42577200  |
| O                                            | 1.11589800  | -0.40336800 | 0.20211200  |
| C                                            | 2.03245200  | -1.01669400 | -0.58705800 |
| O                                            | 2.66242600  | 0.45441100  | -1.28275500 |
| H                                            | 3.56993700  | 0.31262600  | -1.61491700 |
| H                                            | 0.79257300  | -1.27694800 | -2.01124800 |
| O                                            | 1.58709200  | -1.70444700 | -1.63686400 |
| C                                            | 3.20319900  | -1.67720400 | 0.08715100  |
| H                                            | 3.64268100  | -1.00428800 | 0.82409600  |
| H                                            | 2.83501300  | -2.57082000 | 0.60262400  |
| H                                            | 3.95233400  | -1.98909500 | -0.64345100 |
| H                                            | 2.67890400  | 1.22625600  | -0.56938300 |
| H                                            | 1.67420600  | 2.36583900  | 0.74579000  |
| H                                            | 3.15821300  | 2.19032900  | 1.16641600  |
| O                                            | 2.59324600  | 2.36425900  | 0.39456400  |
| C                                            | 0.18465200  | -1.19163100 | 2.30943900  |
| H                                            | -0.60099700 | -1.81070000 | 2.75365600  |
| H                                            | 1.15450300  | -1.60859800 | 2.59609600  |
| H                                            | 0.09714200  | -0.17538600 | 2.69557000  |
| <hr/>                                        |             |             |             |
| Sum of electronic and zero-point Energies=   |             |             | -896.248450 |
| Sum of electronic and thermal Energies=      |             |             | -896.230831 |
| Sum of electronic and thermal Enthalpies=    |             |             | -896.229887 |
| Sum of electronic and thermal Free Energies= |             |             | -896.293263 |

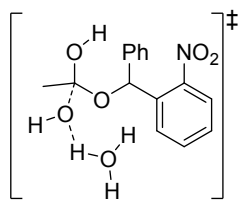

|                                            |             |             |              |
|--------------------------------------------|-------------|-------------|--------------|
| C                                          | -1.49404600 | 3.16282900  | 1.52520500   |
| C                                          | -0.66358100 | 2.04942900  | 1.67560200   |
| C                                          | -0.44470400 | 1.13034500  | 0.63878300   |
| C                                          | -1.13572100 | 1.38059800  | -0.56777100  |
| C                                          | -1.98993900 | 2.47338200  | -0.72302700  |
| C                                          | -2.16069500 | 3.37703400  | 0.32146400   |
| H                                          | -1.62044600 | 3.85107200  | 2.35448000   |
| H                                          | -0.16255500 | 1.89238100  | 2.62657400   |
| H                                          | -2.50461200 | 2.60618700  | -1.66613400  |
| H                                          | -2.81340000 | 4.23355400  | 0.19210000   |
| N                                          | -1.02526500 | 0.49917800  | -1.73078200  |
| O                                          | -0.00496000 | -0.19202800 | -1.85352900  |
| O                                          | -1.95701300 | 0.47191500  | -2.53175500  |
| C                                          | 0.51916300  | -0.01112300 | 0.96399700   |
| H                                          | 0.61030400  | -0.02817100 | 2.05525800   |
| O                                          | 0.04346900  | -1.34480200 | 0.59830600   |
| C                                          | -1.00329000 | -1.92013200 | 1.21643100   |
| O                                          | -2.18645900 | -1.79701600 | -0.01455400  |
| H                                          | -3.02389700 | -2.21902700 | 0.26159300   |
| H                                          | -1.73445000 | -0.36195300 | 2.08499200   |
| O                                          | -1.58988700 | -1.31284100 | 2.25485700   |
| C                                          | -0.81359900 | -3.39540000 | 1.44516300   |
| H                                          | -0.42372800 | -3.87098600 | 0.54475700   |
| H                                          | -0.08170300 | -3.51380100 | 2.25000500   |
| H                                          | -1.75181200 | -3.86451800 | 1.74647500   |
| H                                          | -1.86878200 | -2.23021200 | -0.91397000  |
| H                                          | -0.75008900 | -1.89469700 | -2.51329500  |
| H                                          | -0.84136800 | -3.43186100 | -2.28951300  |
| O                                          | -1.37176100 | -2.61723200 | -2.28228100  |
| C                                          | 1.92598500  | 0.12368600  | 0.39128500   |
| C                                          | 2.40041800  | 1.34396800  | -0.10106600  |
| C                                          | 2.79448700  | -0.97514400 | 0.44434600   |
| C                                          | 3.71955200  | 1.46182600  | -0.54477400  |
| H                                          | 1.74745000  | 2.20960600  | -0.14335300  |
| C                                          | 4.10947600  | -0.85698000 | -0.00546800  |
| H                                          | 2.44071900  | -1.92575600 | 0.82950800   |
| C                                          | 4.57741200  | 0.36231500  | -0.50183700  |
| H                                          | 4.07131000  | 2.41561200  | -0.92769800  |
| H                                          | 4.76903600  | -1.71930500 | 0.03557100   |
| H                                          | 5.60225900  | 0.45385700  | -0.85024600  |
| Sum of electronic and zero-point Energies= |             |             | -1087.929149 |

Sum of electronic and thermal Energies= -1087.908450  
 Sum of electronic and thermal Enthalpies= -1087.907506  
 Sum of electronic and thermal Free Energies= -1087.978774

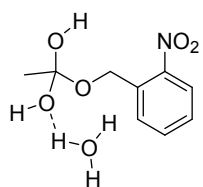

|   |             |             |             |
|---|-------------|-------------|-------------|
| C | 3.21752400  | -1.88300200 | -0.21034000 |
| C | 1.91123200  | -1.81145600 | -0.69984900 |
| C | 1.17517600  | -0.62340100 | -0.66369600 |
| C | 1.80549300  | 0.49591100  | -0.08577200 |
| C | 3.09869200  | 0.43480900  | 0.43342600  |
| C | 3.81288800  | -0.75850700 | 0.35969900  |
| H | 3.76132700  | -2.82072200 | -0.26667200 |
| H | 1.44720600  | -2.69928700 | -1.11867200 |
| H | 3.53419000  | 1.32285900  | 0.87430700  |
| H | 4.82508000  | -0.80477300 | 0.74775600  |
| N | 1.14153500  | 1.80501600  | -0.01172400 |
| O | 0.31188400  | 2.09662900  | -0.87617300 |
| O | 1.46949100  | 2.56357300  | 0.90137500  |
| C | -0.23510800 | -0.62948800 | -1.19896200 |
| H | -0.35908100 | 0.10557400  | -1.99451000 |
| H | -0.47959100 | -1.62349000 | -1.58227400 |
| O | -1.12239300 | -0.30663900 | -0.09689600 |
| C | -2.47480600 | -0.19205100 | -0.39795700 |
| O | -3.04108300 | 0.19236300  | 0.96168300  |
| H | -2.98824800 | 1.16149300  | 1.09055500  |
| H | -2.68119900 | -2.09805700 | -0.22415500 |
| O | -3.06186400 | -1.37069800 | -0.74995000 |
| C | -2.87169000 | 0.89864300  | -1.37179700 |
| H | -2.37469800 | 1.83672600  | -1.11520100 |
| H | -2.57788300 | 0.60735100  | -2.38227200 |
| H | -3.95618800 | 1.02713100  | -1.35457000 |
| H | -2.45482000 | -0.29655100 | 1.80237600  |
| H | -2.12897900 | -1.63185700 | 3.11999800  |
| H | -0.87902500 | -1.10614300 | 2.34664800  |
| O | -1.72044000 | -0.82574300 | 2.75374100  |

Sum of electronic and zero-point Energies= -856.960366  
 Sum of electronic and thermal Energies= -856.943453  
 Sum of electronic and thermal Enthalpies= -856.942509  
 Sum of electronic and thermal Free Energies= -857.006082

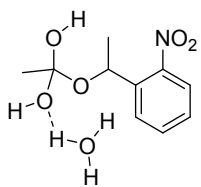

|                                              |             |             |             |
|----------------------------------------------|-------------|-------------|-------------|
| C                                            | -3.25031400 | -1.70759600 | -0.07633500 |
| C                                            | -1.95437400 | -1.76060000 | 0.43713000  |
| C                                            | -1.11205800 | -0.64160400 | 0.46305600  |
| C                                            | -1.64728100 | 0.54270800  | -0.08201600 |
| C                                            | -2.92596400 | 0.60407200  | -0.64491800 |
| C                                            | -3.73962000 | -0.52218900 | -0.62610000 |
| H                                            | -3.86777400 | -2.60013000 | -0.06349300 |
| H                                            | -1.57612000 | -2.70365200 | 0.82101900  |
| H                                            | -3.27270200 | 1.53979600  | -1.06681200 |
| H                                            | -4.74089300 | -0.47307100 | -1.04046400 |
| N                                            | -0.90115100 | 1.79907400  | -0.11264900 |
| O                                            | -0.21863700 | 2.09736700  | 0.88664100  |
| O                                            | -1.00049300 | 2.51961200  | -1.09619500 |
| C                                            | 0.28600200  | -0.85964900 | 1.04307400  |
| H                                            | 0.49813000  | -1.92409700 | 0.92781200  |
| O                                            | 1.30712300  | -0.15040300 | 0.28935700  |
| C                                            | 2.05936500  | -0.87394300 | -0.72973800 |
| O                                            | 2.64175300  | 0.21401500  | -1.40264500 |
| H                                            | 3.37342500  | -0.11417400 | -1.95218600 |
| H                                            | 0.70463700  | -0.96473100 | -2.08287200 |
| O                                            | 1.20892100  | -1.59765500 | -1.53984300 |
| C                                            | 3.07622000  | -1.81634200 | -0.10750000 |
| H                                            | 3.74619300  | -1.25619400 | 0.54808200  |
| H                                            | 2.57971800  | -2.60046900 | 0.46919400  |
| H                                            | 3.65901800  | -2.29838800 | -0.89756100 |
| H                                            | 2.79293100  | 2.17504900  | -0.23784200 |
| H                                            | 1.51844000  | 2.63052900  | 0.63314400  |
| H                                            | 1.97928400  | 1.10050700  | 0.63988200  |
| O                                            | 2.35719300  | 2.09101000  | 0.64003100  |
| C                                            | 0.41225000  | -0.50080900 | 2.52333100  |
| H                                            | -0.30333400 | -1.09603800 | 3.09863200  |
| H                                            | 1.42065900  | -0.73987800 | 2.87452400  |
| H                                            | 0.20421800  | 0.55555400  | 2.69881600  |
| <hr/>                                        |             |             |             |
| Sum of electronic and zero-point Energies=   |             |             | -896.250375 |
| Sum of electronic and thermal Energies=      |             |             | -896.232395 |
| Sum of electronic and thermal Enthalpies=    |             |             | -896.231451 |
| Sum of electronic and thermal Free Energies= |             |             | -896.295756 |



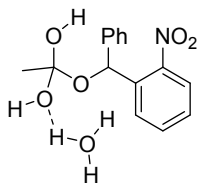

|                                            |             |             |              |
|--------------------------------------------|-------------|-------------|--------------|
| C                                          | -2.78221400 | -1.98599700 | -1.79555300  |
| C                                          | -1.57439900 | -1.28727300 | -1.80945900  |
| C                                          | -1.01888600 | -0.73186300 | -0.65076500  |
| C                                          | -1.76416700 | -0.90122900 | 0.53417900   |
| C                                          | -2.99754900 | -1.55888300 | 0.55975000   |
| C                                          | -3.50213500 | -2.11885700 | -0.60805300  |
| H                                          | -3.16611100 | -2.40870900 | -2.71852600  |
| H                                          | -1.04890200 | -1.15782000 | -2.75089700  |
| H                                          | -3.53199700 | -1.64129800 | 1.49828700   |
| H                                          | -4.44832000 | -2.64887300 | -0.58826400  |
| N                                          | -1.30437900 | -0.39051600 | 1.82289800   |
| O                                          | -0.08057100 | -0.41935300 | 2.05442100   |
| O                                          | -2.13183400 | 0.02032900  | 2.62536900   |
| C                                          | 0.29214600  | 0.03631300  | -0.82349600  |
| H                                          | 0.34256100  | 0.29521300  | -1.88488800  |
| O                                          | 0.28554700  | 1.30010100  | -0.10407600  |
| C                                          | -0.22609100 | 2.50051400  | -0.76424900  |
| O                                          | -0.40731100 | 3.31744200  | 0.36170600   |
| H                                          | -0.46606000 | 4.24337900  | 0.07181500   |
| H                                          | -2.10100600 | 2.09564300  | -0.74134900  |
| O                                          | -1.41184700 | 2.23166400  | -1.41674600  |
| C                                          | 0.77267800  | 3.05377500  | -1.76619500  |
| H                                          | 1.72016800  | 3.26652500  | -1.26698600  |
| H                                          | 0.94164600  | 2.34567400  | -2.58107500  |
| H                                          | 0.37731400  | 3.97615600  | -2.20143400  |
| H                                          | 0.69553600  | 2.67980600  | 2.37031500   |
| H                                          | 0.70512000  | 1.09808600  | 2.67400800   |
| H                                          | 0.93337300  | 1.61129300  | 1.18008100   |
| O                                          | 1.16582300  | 1.83719800  | 2.18564700   |
| C                                          | 1.56599900  | -0.72798000 | -0.47247200  |
| C                                          | 1.55354700  | -2.10134500 | -0.20465000  |
| C                                          | 2.79483000  | -0.05257200 | -0.49693100  |
| C                                          | 2.74534600  | -2.78529700 | 0.04370200   |
| H                                          | 0.61505600  | -2.64524200 | -0.18637200  |
| C                                          | 3.98438800  | -0.73476500 | -0.24091400  |
| H                                          | 2.82660500  | 1.01032100  | -0.71560700  |
| C                                          | 3.96379400  | -2.10498800 | 0.02990400   |
| H                                          | 2.71669400  | -3.85087000 | 0.25296200   |
| H                                          | 4.92681000  | -0.19474200 | -0.25869500  |
| H                                          | 4.88998000  | -2.63729300 | 0.22699300   |
| Sum of electronic and zero-point Energies= |             |             | -1087.929917 |

Sum of electronic and thermal Energies= -1087.908630  
 Sum of electronic and thermal Enthalpies= -1087.907685  
 Sum of electronic and thermal Free Energies= -1087.980406

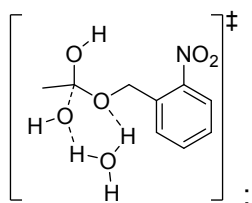

|   |             |             |             |
|---|-------------|-------------|-------------|
| C | 3.16937900  | -1.87526200 | -0.31214400 |
| C | 1.84393500  | -1.78915100 | -0.74419700 |
| C | 1.11784700  | -0.59617600 | -0.66396300 |
| C | 1.78179200  | 0.51213000  | -0.10136200 |
| C | 3.09551600  | 0.43620100  | 0.36101000  |
| C | 3.79680900  | -0.76136200 | 0.24387900  |
| H | 3.70337400  | -2.81595000 | -0.40232800 |
| H | 1.35609100  | -2.66874700 | -1.15313400 |
| H | 3.55622200  | 1.31609300  | 0.79256500  |
| H | 4.82431200  | -0.81906600 | 0.58765600  |
| N | 1.13229100  | 1.82572900  | 0.01467300  |
| O | 0.27561200  | 2.13559600  | -0.81587300 |
| O | 1.49880100  | 2.56793600  | 0.92654900  |
| C | -0.31593700 | -0.59298600 | -1.13560800 |
| H | -0.47754200 | 0.15977600  | -1.90683100 |
| H | -0.57597800 | -1.57696600 | -1.53078100 |
| O | -1.16174100 | -0.29699300 | 0.00537500  |
| C | -2.57108800 | -0.14695100 | -0.25900500 |
| O | -3.14784400 | -0.12302800 | 1.05789300  |
| H | -3.41964100 | 0.78266400  | 1.28871800  |
| H | -2.94738300 | -2.03466900 | -0.41634400 |
| O | -3.07051700 | -1.22799900 | -0.94879000 |
| C | -2.89390200 | 1.12523100  | -1.02145300 |
| H | -2.42778300 | 1.98375900  | -0.53332700 |
| H | -2.52195800 | 1.05835600  | -2.04541600 |
| H | -3.97845200 | 1.25554500  | -1.06104200 |
| H | -2.19847200 | -0.71493700 | 2.16725900  |
| H | -1.27311600 | -1.95946600 | 2.74198800  |
| H | -0.79698900 | -0.92889500 | 1.57700600  |
| O | -1.25616500 | -1.01646600 | 2.47339000  |

Sum of electronic and zero-point Energies= -856.958329  
 Sum of electronic and thermal Energies= -856.942335  
 Sum of electronic and thermal Enthalpies= -856.941391  
 Sum of electronic and thermal Free Energies= -857.001955

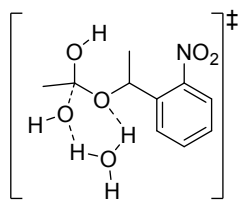

|                                              |             |             |             |
|----------------------------------------------|-------------|-------------|-------------|
| C                                            | -2.54154100 | -2.41459300 | -0.22515600 |
| C                                            | -1.32435100 | -2.01037300 | 0.32458900  |
| C                                            | -0.94576600 | -0.66413500 | 0.42709600  |
| C                                            | -1.88618200 | 0.27540200  | -0.05807400 |
| C                                            | -3.11272800 | -0.11525500 | -0.60568400 |
| C                                            | -3.44260800 | -1.46217300 | -0.69573300 |
| H                                            | -2.77835600 | -3.47229700 | -0.28351500 |
| H                                            | -0.63784900 | -2.76775700 | 0.68884700  |
| H                                            | -3.79050600 | 0.64802700  | -0.96480300 |
| H                                            | -4.39098200 | -1.75818400 | -1.13143800 |
| N                                            | -1.65925100 | 1.72571900  | -0.04723600 |
| O                                            | -0.50147600 | 2.15328900  | 0.04389300  |
| O                                            | -2.63267700 | 2.46876900  | -0.14265300 |
| C                                            | 0.39608400  | -0.40933000 | 1.11918000  |
| H                                            | 0.77217600  | -1.39517100 | 1.39418900  |
| O                                            | 1.37711700  | 0.15157100  | 0.19816600  |
| C                                            | 2.37547200  | -0.73072100 | -0.36247600 |
| O                                            | 2.86197100  | 0.07693100  | -1.42532000 |
| H                                            | 3.69740900  | -0.29945700 | -1.75076800 |
| H                                            | 1.21934200  | -1.65778700 | -1.58127300 |
| O                                            | 1.80703800  | -1.89361000 | -0.84017300 |
| C                                            | 3.45254000  | -1.08509700 | 0.64875600  |
| H                                            | 3.91331300  | -0.17164300 | 1.03006000  |
| H                                            | 3.02617000  | -1.64848500 | 1.48246200  |
| H                                            | 4.21519500  | -1.70990100 | 0.17525000  |
| H                                            | 2.62378600  | 1.88439800  | -1.25364200 |
| H                                            | 1.38529100  | 2.91410200  | -1.09723700 |
| H                                            | 1.59422900  | 1.62202500  | -0.11343600 |
| O                                            | 2.07180900  | 2.41162900  | -0.60941600 |
| C                                            | 0.34365400  | 0.43307300  | 2.39179100  |
| H                                            | -0.34580500 | -0.03427100 | 3.10201600  |
| H                                            | 1.33834700  | 0.46098500  | 2.84665500  |
| H                                            | 0.01528800  | 1.45595400  | 2.20557600  |
| <hr/>                                        |             |             |             |
| Sum of electronic and zero-point Energies=   |             |             | -896.247680 |
| Sum of electronic and thermal Energies=      |             |             | -896.230040 |
| Sum of electronic and thermal Enthalpies=    |             |             | -896.229096 |
| Sum of electronic and thermal Free Energies= |             |             | -896.293249 |

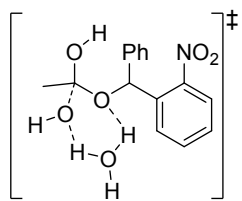

|                                            |             |             |              |
|--------------------------------------------|-------------|-------------|--------------|
| C                                          | -2.58837600 | -2.29096900 | -1.73404100  |
| C                                          | -1.41828500 | -1.53256200 | -1.76587700  |
| C                                          | -0.95119700 | -0.82969800 | -0.64811200  |
| C                                          | -1.74780800 | -0.91553900 | 0.51233800   |
| C                                          | -2.94746100 | -1.63408300 | 0.54963600   |
| C                                          | -3.36135200 | -2.34002800 | -0.57329300  |
| H                                          | -2.90277700 | -2.82710300 | -2.62379500  |
| H                                          | -0.85100000 | -1.47277300 | -2.69006700  |
| H                                          | -3.52670500 | -1.64634900 | 1.46490100   |
| H                                          | -4.27965500 | -2.91645800 | -0.54129000  |
| N                                          | -1.39375100 | -0.23984900 | 1.75987700   |
| O                                          | -0.19250500 | -0.19821400 | 2.08601900   |
| O                                          | -2.29063200 | 0.24301000  | 2.43914700   |
| C                                          | 0.33292200  | -0.02162600 | -0.84249200  |
| H                                          | 0.39692700  | 0.18040100  | -1.91632900  |
| O                                          | 0.29292000  | 1.26247000  | -0.17314100  |
| C                                          | -0.27369500 | 2.40182500  | -0.85432300  |
| O                                          | -0.56991000 | 3.22964000  | 0.26808100   |
| H                                          | -0.67670000 | 4.15080700  | -0.02551800  |
| H                                          | -2.12013900 | 1.86715700  | -0.90499000  |
| O                                          | -1.41960800 | 2.07626600  | -1.54863600  |
| C                                          | 0.71436600  | 3.04035900  | -1.81500100  |
| H                                          | 1.62607700  | 3.31996900  | -1.28323100  |
| H                                          | 0.96424400  | 2.34407800  | -2.61962900  |
| H                                          | 0.26915100  | 3.93140800  | -2.26694100  |
| H                                          | 0.26693700  | 2.82760700  | 1.76507000   |
| H                                          | 0.40914000  | 1.44376800  | 2.60475500   |
| H                                          | 1.15755600  | 1.69264400  | 1.26991300   |
| O                                          | 0.92885700  | 2.16097300  | 2.13586500   |
| C                                          | 1.61961200  | -0.72869800 | -0.42195500  |
| C                                          | 1.63203900  | -2.03635000 | 0.07474200   |
| C                                          | 2.83922100  | -0.05520400 | -0.59084600  |
| C                                          | 2.83925000  | -2.65773300 | 0.40298600   |
| H                                          | 0.70209100  | -2.57819600 | 0.20964200   |
| C                                          | 4.04388800  | -0.67341000 | -0.25691600  |
| H                                          | 2.84999200  | 0.95630600  | -0.98643400  |
| C                                          | 4.04748900  | -1.97881100 | 0.24133300   |
| H                                          | 2.83045000  | -3.67293500 | 0.78944300   |
| H                                          | 4.97873100  | -0.13682300 | -0.39177500  |
| H                                          | 4.98528100  | -2.46256200 | 0.49937800   |
| Sum of electronic and zero-point Energies= |             |             | -1087.928606 |

Sum of electronic and thermal Energies= -1087.908054  
 Sum of electronic and thermal Enthalpies= -1087.907109  
 Sum of electronic and thermal Free Energies= -1087.978120

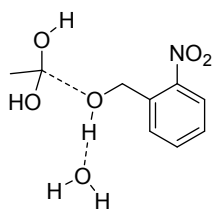

|   |             |             |             |
|---|-------------|-------------|-------------|
| C | 3.64734000  | -1.43547000 | -0.41203900 |
| C | 2.33484500  | -1.53040000 | -0.88191600 |
| C | 1.40906800  | -0.49886200 | -0.69764900 |
| C | 1.86280800  | 0.63037800  | 0.00714400  |
| C | 3.15766200  | 0.73300000  | 0.51508400  |
| C | 4.06065300  | -0.30380600 | 0.29140000  |
| H | 4.34031500  | -2.25337300 | -0.58432500 |
| H | 2.01424600  | -2.43061400 | -1.39865700 |
| H | 3.44735000  | 1.62359700  | 1.06012000  |
| H | 5.07562800  | -0.22557000 | 0.66725400  |
| N | 0.98568900  | 1.78508500  | 0.23246000  |
| O | 0.21256600  | 2.11866300  | -0.66958600 |
| O | 1.09157000  | 2.38869100  | 1.30038900  |
| C | -0.02434000 | -0.67610400 | -1.16834500 |
| H | -0.27221600 | 0.06504400  | -1.92984500 |
| H | -0.12723800 | -1.67187800 | -1.61639900 |
| O | -0.95311400 | -0.49896900 | -0.10022700 |
| C | -3.33399900 | 0.18542100  | -0.07529100 |
| O | -3.29067300 | 0.15298900  | 1.21569400  |
| H | -2.87988100 | 0.95335500  | 1.59901200  |
| H | -4.04805800 | -1.56185700 | -0.02120200 |
| O | -3.84080400 | -0.84364900 | -0.65761600 |
| C | -3.04289300 | 1.38669700  | -0.88773100 |
| H | -2.12872100 | 1.87192800  | -0.53992800 |
| H | -2.95101000 | 1.11093800  | -1.93774900 |
| H | -3.88657900 | 2.07910500  | -0.77015900 |
| H | -1.41669300 | -2.58253000 | 2.25174000  |
| H | -1.57359100 | -3.39672000 | 0.96495700  |
| H | -0.92052600 | -1.30754800 | 0.47220600  |
| O | -0.96950800 | -2.78204900 | 1.41282200  |

Sum of electronic and zero-point Energies= -856.969329  
 Sum of electronic and thermal Energies= -856.950605  
 Sum of electronic and thermal Enthalpies= -856.949661  
 Sum of electronic and thermal Free Energies= -857.018806

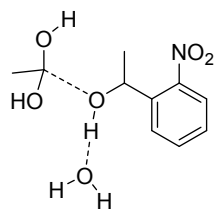

|                                              |             |             |             |
|----------------------------------------------|-------------|-------------|-------------|
| C                                            | -3.20330500 | -2.02561200 | 0.22879000  |
| C                                            | -1.94661400 | -1.78810900 | 0.78598000  |
| C                                            | -1.24295000 | -0.59723000 | 0.56281000  |
| C                                            | -1.87242200 | 0.33886900  | -0.27477800 |
| C                                            | -3.10724800 | 0.10411000  | -0.88438800 |
| C                                            | -3.78583000 | -1.08031800 | -0.61731100 |
| H                                            | -3.71573100 | -2.95961200 | 0.43829800  |
| H                                            | -1.48413400 | -2.55482700 | 1.40200200  |
| H                                            | -3.52966900 | 0.85920200  | -1.53733400 |
| H                                            | -4.75529900 | -1.26204100 | -1.06947900 |
| N                                            | -1.27546000 | 1.64777900  | -0.55339200 |
| O                                            | -0.82781000 | 2.29309700  | 0.40406600  |
| O                                            | -1.29441500 | 2.06443900  | -1.70771700 |
| C                                            | 0.16028900  | -0.47234500 | 1.16436100  |
| H                                            | 0.51262100  | -1.50429000 | 1.28367400  |
| O                                            | 1.06482900  | 0.14013000  | 0.24258200  |
| C                                            | 2.90928700  | -1.13852500 | -0.75775100 |
| O                                            | 2.83567500  | -0.48396100 | -1.86785700 |
| H                                            | 3.35054200  | 0.34732400  | -1.85495900 |
| H                                            | 1.72915000  | -2.40977400 | -1.50550300 |
| O                                            | 2.27293900  | -2.25589800 | -0.70286400 |
| C                                            | 3.84389100  | -0.81072400 | 0.34393700  |
| H                                            | 3.94696100  | 0.26833400  | 0.46199700  |
| H                                            | 3.50296700  | -1.26711100 | 1.27226900  |
| H                                            | 4.82266100  | -1.23163700 | 0.07802900  |
| H                                            | 2.45256300  | 2.92574400  | -0.05793400 |
| H                                            | 1.01493400  | 3.06463800  | 0.46799400  |
| H                                            | 1.34481800  | 1.03847500  | 0.54891100  |
| O                                            | 1.89642500  | 2.72486600  | 0.71277000  |
| C                                            | 0.17791400  | 0.18330200  | 2.54965900  |
| H                                            | -0.45566500 | -0.38217300 | 3.24033400  |
| H                                            | 1.19989700  | 0.18009200  | 2.94353700  |
| H                                            | -0.18761800 | 1.21130900  | 2.50622700  |
| <hr/>                                        |             |             |             |
| Sum of electronic and zero-point Energies=   |             |             | -896.256741 |
| Sum of electronic and thermal Energies=      |             |             | -896.237011 |
| Sum of electronic and thermal Enthalpies=    |             |             | -896.236066 |
| Sum of electronic and thermal Free Energies= |             |             | -896.307061 |

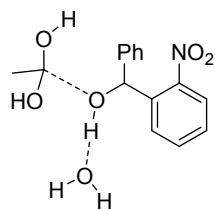

|                                            |             |             |              |
|--------------------------------------------|-------------|-------------|--------------|
| C                                          | -1.67435300 | -2.98886300 | -1.85440000  |
| C                                          | -0.86412900 | -1.85263800 | -1.83345900  |
| C                                          | -0.53991800 | -1.18810400 | -0.64399700  |
| C                                          | -1.09943200 | -1.72262000 | 0.53012200   |
| C                                          | -1.95089500 | -2.82957500 | 0.52927000   |
| C                                          | -2.22785700 | -3.47751900 | -0.67017700  |
| H                                          | -1.88836500 | -3.47782600 | -2.79977200  |
| H                                          | -0.47867300 | -1.45691900 | -2.76916300  |
| H                                          | -2.36471800 | -3.18084000 | 1.46717600   |
| H                                          | -2.87139800 | -4.35104800 | -0.67698800  |
| N                                          | -0.80493800 | -1.15208900 | 1.84460500   |
| O                                          | 0.35797200  | -0.78943400 | 2.06552400   |
| O                                          | -1.70819300 | -1.09373300 | 2.67487500   |
| C                                          | 0.27716700  | 0.10462600  | -0.75117200  |
| H                                          | 0.12673000  | 0.43667400  | -1.78697900  |
| O                                          | -0.28906600 | 1.14663700  | 0.04467700   |
| C                                          | -2.01424800 | 2.80257300  | -0.73251200  |
| O                                          | -2.74013000 | 2.61955400  | 0.31725000   |
| H                                          | -2.46673300 | 3.17536600  | 1.07419900   |
| H                                          | -3.04294900 | 1.47340200  | -1.59496100  |
| O                                          | -2.31975200 | 2.11315400  | -1.77356300  |
| C                                          | -0.99326900 | 3.86572700  | -0.87044100  |
| H                                          | -0.44540300 | 4.00157600  | 0.06284100   |
| H                                          | -0.31094700 | 3.62101900  | -1.68319600  |
| H                                          | -1.51891800 | 4.79888900  | -1.11204600  |
| H                                          | 0.11374300  | 2.43040600  | 2.84421400   |
| H                                          | 0.71032700  | 1.01431100  | 2.84391000   |
| H                                          | 0.24780200  | 1.34018300  | 0.85284500   |
| O                                          | 0.83302700  | 1.90284900  | 2.45984800   |
| C                                          | 1.78685800  | -0.04220300 | -0.56046800  |
| C                                          | 2.57412400  | 1.11908700  | -0.55550800  |
| C                                          | 2.42053000  | -1.28549000 | -0.45727100  |
| C                                          | 3.96173100  | 1.03873000  | -0.43788700  |
| H                                          | 2.09731100  | 2.09124900  | -0.64138800  |
| C                                          | 3.81061500  | -1.36741000 | -0.34407700  |
| H                                          | 1.83110000  | -2.19689900 | -0.46008900  |
| C                                          | 4.58607300  | -0.20689100 | -0.33222400  |
| H                                          | 4.55488900  | 1.94922500  | -0.43327000  |
| H                                          | 4.28496800  | -2.34151200 | -0.26070900  |
| H                                          | 5.66694300  | -0.27142700 | -0.24253400  |
| Sum of electronic and zero-point Energies= |             |             | -1087.937520 |

Sum of electronic and thermal Energies= -1087.914474  
 Sum of electronic and thermal Enthalpies= -1087.913530  
 Sum of electronic and thermal Free Energies= -1087.992976

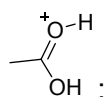

|                                              |             |             |             |
|----------------------------------------------|-------------|-------------|-------------|
| C                                            | -0.05108700 | 0.00000600  | -0.00952800 |
| O                                            | -0.64762800 | 1.13812900  | -0.00186100 |
| H                                            | -1.62789200 | 1.11690500  | 0.02036400  |
| O                                            | -0.64752700 | -1.13817000 | -0.00185300 |
| H                                            | -1.62779300 | -1.11703000 | 0.02029500  |
| C                                            | 1.42677400  | 0.00005800  | -0.00402300 |
| H                                            | 1.80305600  | 0.90285400  | -0.48573900 |
| H                                            | 1.75666000  | -0.00075300 | 1.04314900  |
| H                                            | 1.80308600  | -0.90204000 | -0.48704600 |
| <hr/>                                        |             |             |             |
| Sum of electronic and zero-point Energies=   |             |             | -229.413618 |
| Sum of electronic and thermal Energies=      |             |             | -229.408935 |
| Sum of electronic and thermal Enthalpies=    |             |             | -229.407991 |
| Sum of electronic and thermal Free Energies= |             |             | -229.441024 |

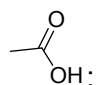

|                                              |             |             |             |
|----------------------------------------------|-------------|-------------|-------------|
| C                                            | -0.09188000 | 0.12215500  | -0.00002900 |
| O                                            | -0.64360300 | 1.20452200  | 0.00000300  |
| O                                            | -0.77933800 | -1.04306000 | -0.00000400 |
| H                                            | -1.72903000 | -0.81534400 | 0.00005300  |
| C                                            | 1.39624600  | -0.11152000 | 0.00000000  |
| H                                            | 1.91983800  | 0.84456300  | -0.00001100 |
| H                                            | 1.68318700  | -0.69230600 | 0.88259800  |
| H                                            | 1.68333700  | -0.69242500 | -0.88246300 |
| <hr/>                                        |             |             |             |
| Sum of electronic and zero-point Energies=   |             |             | -229.026673 |
| Sum of electronic and thermal Energies=      |             |             | -229.022079 |
| Sum of electronic and thermal Enthalpies=    |             |             | -229.021135 |
| Sum of electronic and thermal Free Energies= |             |             | -229.054060 |

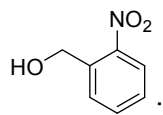

|   |             |             |             |
|---|-------------|-------------|-------------|
| C | -2.63763500 | -0.57823900 | -0.03674000 |
| C | -1.51477800 | -1.37035600 | 0.20540200  |
| C | -0.22000800 | -0.83822500 | 0.24335100  |
| C | -0.11374500 | 0.55257200  | 0.03302100  |
| C | -1.22824100 | 1.36524700  | -0.19694900 |
| C | -2.49529800 | 0.79540100  | -0.24164800 |



|                                              |             |             |             |
|----------------------------------------------|-------------|-------------|-------------|
| H                                            | -3.62248300 | -1.03463900 | -0.06319300 |
| H                                            | -1.63974900 | -2.43594200 | 0.37449400  |
| H                                            | -1.08551200 | 2.42786900  | -0.34683600 |
| H                                            | -3.36170200 | 1.41988200  | -0.43330300 |
| N                                            | 1.18189100  | 1.23698300  | 0.05711100  |
| O                                            | 2.21590100  | 0.58151600  | -0.14080700 |
| O                                            | 1.19702600  | 2.44937600  | 0.26664500  |
| C                                            | 0.94539600  | -1.77976400 | 0.51133300  |
| H                                            | 1.59913900  | -1.36712100 | 1.28982000  |
| H                                            | 0.54063200  | -2.72450100 | 0.88323300  |
| O                                            | 1.67959900  | -2.09945800 | -0.66474600 |
| H                                            | 2.14208000  | -1.27571900 | -0.89934400 |
| Sum of electronic and zero-point Energies=   |             |             | -551.142663 |
| Sum of electronic and thermal Energies=      |             |             | -551.133623 |
| Sum of electronic and thermal Enthalpies=    |             |             | -551.132679 |
| Sum of electronic and thermal Free Energies= |             |             | -551.177323 |

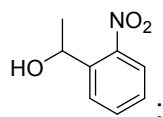

|                                              |             |             |             |
|----------------------------------------------|-------------|-------------|-------------|
| C                                            | -0.87543900 | 2.55982300  | 0.15917300  |
| C                                            | 0.33590400  | 1.88082700  | 0.02188400  |
| C                                            | 0.40569600  | 0.48523700  | -0.07757400 |
| C                                            | -0.83253700 | -0.19262400 | -0.03717300 |
| C                                            | -2.05832000 | 0.47113700  | 0.07482300  |
| C                                            | -2.08009300 | 1.85582100  | 0.18531800  |
| H                                            | -0.87496200 | 3.64266600  | 0.24010600  |
| H                                            | 1.25260500  | 2.45720400  | -0.01851200 |
| H                                            | -2.97325000 | -0.10786000 | 0.09004700  |
| H                                            | -3.02642900 | 2.37620500  | 0.29018900  |
| N                                            | -0.92002300 | -1.65475500 | -0.11040000 |
| O                                            | 0.01896600  | -2.33934100 | 0.32303100  |
| O                                            | -1.94065800 | -2.15250700 | -0.58373800 |
| C                                            | 1.75824100  | -0.22689900 | -0.22073500 |
| H                                            | 1.62840200  | -1.05834400 | -0.92458700 |
| O                                            | 2.18347400  | -0.73222500 | 1.04864600  |
| H                                            | 1.55382800  | -1.44448900 | 1.25897500  |
| C                                            | 2.88687400  | 0.65385100  | -0.74557400 |
| H                                            | 3.14736600  | 1.44156800  | -0.03182700 |
| H                                            | 3.77435600  | 0.03166500  | -0.89366800 |
| H                                            | 2.62204300  | 1.11421900  | -1.70227800 |
| Sum of electronic and zero-point Energies=   |             |             | -590.429981 |
| Sum of electronic and thermal Energies=      |             |             | -590.419561 |
| Sum of electronic and thermal Enthalpies=    |             |             | -590.418617 |
| Sum of electronic and thermal Free Energies= |             |             | -590.466127 |

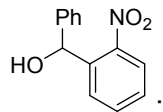

|                                              |             |             |             |
|----------------------------------------------|-------------|-------------|-------------|
| C                                            | 1.16138800  | 2.67393800  | -0.41123200 |
| C                                            | 0.28060000  | 1.59222400  | -0.43728700 |
| C                                            | 0.70308000  | 0.28084100  | -0.18803800 |
| C                                            | 2.07634200  | 0.11877800  | 0.09404900  |
| C                                            | 2.96836400  | 1.19400000  | 0.15468000  |
| C                                            | 2.51029500  | 2.47887400  | -0.10939800 |
| H                                            | 0.78876000  | 3.67211000  | -0.62062800 |
| H                                            | -0.76883900 | 1.76788200  | -0.64534900 |
| H                                            | 4.00848300  | 1.00503400  | 0.38936200  |
| H                                            | 3.20010400  | 3.31594500  | -0.08126100 |
| N                                            | 2.66726300  | -1.20077200 | 0.33492500  |
| O                                            | 2.15975300  | -2.19549300 | -0.20602000 |
| O                                            | 3.66517700  | -1.27003300 | 1.05018300  |
| C                                            | -0.29649700 | -0.88920500 | -0.24229900 |
| H                                            | -0.02055400 | -1.60103700 | 0.54513100  |
| O                                            | -0.22137500 | -1.52720500 | -1.51561300 |
| H                                            | 0.66277500  | -1.93526400 | -1.53447200 |
| C                                            | -1.73312400 | -0.46793900 | 0.01341900  |
| C                                            | -2.16392100 | -0.24903000 | 1.32898200  |
| C                                            | -2.64239300 | -0.29710300 | -1.03672200 |
| C                                            | -3.47769100 | 0.14045100  | 1.59093800  |
| H                                            | -1.46750000 | -0.38668300 | 2.15328800  |
| C                                            | -3.95976600 | 0.08950400  | -0.77493600 |
| H                                            | -2.31720000 | -0.47766900 | -2.05552000 |
| C                                            | -4.38085100 | 0.31100700  | 0.53768300  |
| H                                            | -3.79781800 | 0.30334700  | 2.61649000  |
| H                                            | -4.65676600 | 0.21565500  | -1.59918200 |
| H                                            | -5.40568900 | 0.60989500  | 0.74026900  |
| Sum of electronic and zero-point Energies=   |             |             | -782.112893 |
| Sum of electronic and thermal Energies=      |             |             | -782.099248 |
| Sum of electronic and thermal Enthalpies=    |             |             | -782.098303 |
| Sum of electronic and thermal Free Energies= |             |             | -782.154422 |

H<sub>2</sub>O:

|                                              |            |             |             |
|----------------------------------------------|------------|-------------|-------------|
| H                                            | 0.00000000 | 0.75854300  | -0.48368000 |
| H                                            | 0.00000000 | -0.75854300 | -0.48368000 |
| O                                            | 0.00000000 | 0.00000000  | 0.12092000  |
| Sum of electronic and zero-point Energies=   |            |             | -76.395230  |
| Sum of electronic and thermal Energies=      |            |             | -76.392396  |
| Sum of electronic and thermal Enthalpies=    |            |             | -76.391451  |
| Sum of electronic and thermal Free Energies= |            |             | -76.412904  |

H<sub>3</sub>O<sup>+</sup>:

|                                              |             |             |             |
|----------------------------------------------|-------------|-------------|-------------|
| H                                            | 0.00000000  | 0.92873200  | -0.24111700 |
| H                                            | -0.80430600 | -0.46436600 | -0.24111700 |
| H                                            | 0.80430600  | -0.46436600 | -0.24111700 |
| O                                            | 0.00000000  | 0.00000000  | 0.09041900  |
| <hr/>                                        |             |             |             |
| Sum of electronic and zero-point Energies=   |             |             | -76.778507  |
| Sum of electronic and thermal Energies=      |             |             | -76.775642  |
| Sum of electronic and thermal Enthalpies=    |             |             | -76.774698  |
| Sum of electronic and thermal Free Energies= |             |             | -76.796617  |
